# Supplementary material for: Non-Alkaloid Cholinesterase Inhibitory Compounds from Natural Sources
Source: MDPI journal article supplement (doi:10.3390/molecules26185582), 2021-09-14
Supplement: s1 [file s1]

## Review

# Non-Alkaloid Cholinesterase Inhibitory Compounds from Natural Sources

Alfred Ngege Tamfu <sup>1,4\*</sup>, Selcuk Kucukaydin <sup>2</sup>, Balakyz Yeskaliyeva <sup>3,4</sup>, Mehmet Ozturk <sup>4</sup> and Rodica Mihaela Dinica <sup>5\*</sup>

<sup>1</sup> School of Chemical Engineering and Mineral Industries, University of Ngaoundere, 454 Ngaoundere, Cameroon; [macntamfu@yahoo.co.uk](mailto:macntamfu@yahoo.co.uk)

<sup>2</sup> Department of Medical Services and Techniques, Koycegiz Vocational School of Health Services, Mugla Sitki Kocman University, 48800 Mugla, Turkey; [selukkkucukaydin@gmail.com](mailto:selukkkucukaydin@gmail.com)

<sup>3</sup> Faculty of Chemistry and Chemical Technology, Al-Farabi Kazakh National University, Almaty 050040, Kazakhstan; [balakyzyes@gmail.com](mailto:balakyzyes@gmail.com)

<sup>4</sup> Department of Chemistry, Mugla Sitki Kocman University, 48000 Mugla, Turkey; [mehmetozturk@mu.edu.tr](mailto:mehmetozturk@mu.edu.tr)

<sup>5</sup> Dunarea de Jos University, Faculty of Sciences and Environment, Department of Chemistry, Physics and Environment, 47 Domneasca Str., 800008, Galati, Romania; [rodica.dinica@ugal.ro](mailto:rodica.dinica@ugal.ro)

\* Correspondence: [macntamfu@yahoo.co.uk](mailto:macntamfu@yahoo.co.uk) (A.N.T.); [rodica.dinica@ugal.ro](mailto:rodica.dinica@ugal.ro) (R.M.D.); Tel.: +237-675590353 (A.N.T.); +33-6130-251 (R.M.D.)

## Supplementary Material

**Table S1: Terpenoids as Acetyl and Butyryl cholinesterase inhibitors**

| No | Name                                                                             | Structure                                                                           | Plant source                 | IC <sub>50</sub> or %inh (conc.)  |                                   | Reference |
|----|----------------------------------------------------------------------------------|-------------------------------------------------------------------------------------|------------------------------|-----------------------------------|-----------------------------------|-----------|
|    |                                                                                  |                                                                                     |                              | AChE                              | BuChE                             |           |
| 1. | Taxodione                                                                        | 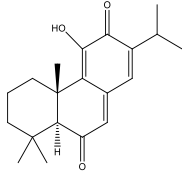 | <i>Salvia austriaca</i>      | 54.84 µg/mL (IC <sub>50</sub> )   | 195.9 µg/mL (IC <sub>50</sub> )   | [14]      |
| 2. | (5S,10S,16R)-11,16-dihydroxy-12-methoxy-17(15→16)-abeoabieta-8,11,13-trien-7-one |  | <i>Caryopteris mongolica</i> | 27.9 ± 5.2 µM (IC <sub>50</sub> ) | 73.8 ± 1.7 µM (IC <sub>50</sub> ) | [15]      |
| 3. | (5S,10S,16R)-11,12,16-trihydroxy-17(15→16)-abeoabieta-8,11,13-trien-7-one        |  | <i>Caryopteris mongolica</i> | 64.6 ± 5.9 µM (IC <sub>50</sub> ) | >100 µM (IC <sub>50</sub> )       | [15]      |

|     |                                                                                                 |                                                                                     |                                 |                                                    |                                                   |      |
|-----|-------------------------------------------------------------------------------------------------|-------------------------------------------------------------------------------------|---------------------------------|----------------------------------------------------|---------------------------------------------------|------|
| 4.  | (5S,10S,16R)-11,12,16-trihydroxy-17(15→16),18(4→3)-diabeo-abieta-3,8,11,13-tetraen-7-one        | 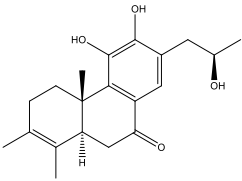   | <i>Caryopteris mongolica</i>    | $38.4 \pm 10.8 \mu\text{M}$<br>(IC <sub>50</sub> ) | $98.4 \pm 1.1 \mu\text{M}$<br>(IC <sub>50</sub> ) | [15] |
| 5.  | (5S,10S,16R)-11,12-dihydroxy-16-methoxy-17(15→16),18(4→3)-diabeo-abieta-3,8,11,13-tetraen-7-one |    | <i>Caryopteris mongolica</i>    | $20.8 \pm 7.1 \mu\text{M}$<br>(IC <sub>50</sub> )  | $>100 \mu\text{M}$<br>(IC <sub>50</sub> )         | [15] |
| 6.  | (15R)-cyrtophyllone B                                                                           |    | <i>Caryopteris mongolica</i>    | $55.7 \pm 7.4 \mu\text{M}$<br>(IC <sub>50</sub> )  | $93.2 \pm 6.2 \mu\text{M}$<br>(IC <sub>50</sub> ) | [15] |
| 7.  | Incanone                                                                                        |   | <i>Caryopteris mongolica</i>    | $87.5 \pm 12.3 \mu\text{M}$<br>(IC <sub>50</sub> ) | $>100 \mu\text{M}$<br>(IC <sub>50</sub> )         | [15] |
| 8.  | Arucadiol                                                                                       |  | <i>Perovskia atriplicifolia</i> | -                                                  | $91.97 \pm 0.08\%$<br>(10 $\mu\text{g/mL}$ )      | [16] |
| 9.  | Miltirone                                                                                       |  | <i>Perovskia atriplicifolia</i> | -                                                  | $98.36 \pm 0.89\%$<br>(10 $\mu\text{g/mL}$ )      | [16] |
| 10. | 1-Oxomiltirone                                                                                  |  | <i>Perovskia atriplicifolia</i> | $11.08 \pm 0.38\%$<br>(10 $\mu\text{g/mL}$ )       | $77.45 \pm 1.97\%$<br>(10 $\mu\text{g/mL}$ )      | [16] |
| 11. | 1,2-Didehydromiltirone                                                                          |  | <i>Perovskia atriplicifolia</i> | $10.08 \pm 2.22\%$<br>(10 $\mu\text{g/mL}$ )       | $97.36 \pm 2.78\%$<br>(10 $\mu\text{g/mL}$ )      | [16] |

|     |                                  |                                                                                     |                                 |                              |                                 |      |
|-----|----------------------------------|-------------------------------------------------------------------------------------|---------------------------------|------------------------------|---------------------------------|------|
| 12. | Tanshinone IIa                   | 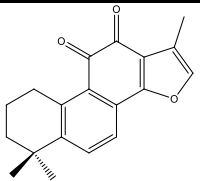   | <i>Salvia glutinosa</i>         | 45.16 ± 5.49 %<br>(10 µg/mL) | 97.41 ± 0.23<br>% (10<br>µg/mL) | [16] |
| 13. | Cryptotanshinone                 |    | <i>Perovskia atriplicifolia</i> | 28.95 ± 1.74 %<br>(10 µg/mL) | 74.37 ±<br>3.57% (10<br>µg/mL)  | [16] |
| 14. | 1,2-Didehydro-<br>tanshinone IIa |    | <i>Perovskia atriplicifolia</i> | 41.88 ± 2.05 %<br>(10 µg/mL) | 67.65 ± 1.88<br>% (10<br>µg/mL) | [16] |
| 15. | 15,16-Dihydro-<br>tanshinone     |   | <i>Salvia glutinosa</i>         | 65.17 ± 1.39 %<br>(10 µg/mL) | 94.88 ± 1.88<br>% (10<br>µg/mL) | [16] |
| 16. | Tanshinone I                     |  | <i>Salvia glutinosa</i>         | 6.19 ± 3.91 %<br>(10 µg/mL)  | 85.84 ± 4.15<br>% (10<br>µg/mL) | [16] |
| 17. | Isotanshinone II                 |  | <i>Salvia glutinosa</i>         | 5.55 ± 3.03 %<br>(10 µg/mL)  | 77.81 ± 1.45<br>% (10<br>µg/mL) | [16] |
| 18. | 1(S)-OH-Tanshinone<br>IIa        |  | <i>Salvia glutinosa</i>         | 36.32 ± 1.85 %<br>(10 µg/mL) | 64.50 ± 1.50<br>% (10<br>µg/mL) | [16] |
| 19. | 1β-OH-Crypto-<br>tanshinone      |  | <i>Perovskia atriplicifolia</i> | 17.70 ± 3.86 %<br>(10 µg/mL) | 93.15 ± 2.31<br>% (10<br>µg/mL) | [16] |

|     |                                                                                                   |  |                                  |                                           |                                           |      |
|-----|---------------------------------------------------------------------------------------------------|--|----------------------------------|-------------------------------------------|-------------------------------------------|------|
| 20. | Nuciferoside                                                                                      |  | <i>Nelumbo nucifera</i>          | 3.20±0.22 $\mu$ M<br>(IC <sub>50</sub> )  | 83.06±0.80<br>$\mu$ M (IC <sub>50</sub> ) | [17] |
| 21. | cycloartenol                                                                                      |  | <i>Nelumbo nucifera</i>          | 11.89±1.91 $\mu$ M<br>(IC <sub>50</sub> ) | 13.93±1.65<br>$\mu$ M (IC <sub>50</sub> ) | [17] |
| 22. | 7,8-didehydrocimi-<br>genol                                                                       |  | <i>Cimicifuga dahu-<br/>rica</i> | 43.1 ± 5.6 %<br>(100 $\mu$ M)             | 53.6 ± 0.9 %<br>(100 $\mu$ M)             | [18] |
| 23. | 24-epi-24-O-acetyl-<br>7,8-didehydrosheng-<br>manol                                               |  | <i>Cimicifuga dahu-<br/>rica</i> | 53.7 ± 1.6 %<br>(100 $\mu$ M)             | 57.3 ± 0.3 %<br>(100 $\mu$ M)             | [18] |
| 24. | 25-triepoxy-12 $\beta$ -ace-<br>toxy-3 $\beta$ ,26-dihy-<br>droxy-9,19-cy-<br>clolanost-7-<br>ene |  | <i>Cimicifuga dahu-<br/>rica</i> | 52.0 ± 0.1 %<br>(100 $\mu$ M)             | 41.0 ± 0.1 %<br>(100 $\mu$ M)             | [18] |
| 25. | 25-O-acetyl-7,8-dide-<br>hydrocimigenol                                                           |  | <i>Cimicifuga dahu-<br/>rica</i> | 55.4 ± 2.6 %<br>(100 $\mu$ M)             | 18.0 ± 0.4 %<br>(100 $\mu$ M)             | [18] |
| 26. | 25-anhydro-7,8-<br>didehydrocimigenol                                                             |  | <i>Cimicifuga dahu-<br/>rica</i> | 48.6 ± 0.6 %<br>(100 $\mu$ M)             | 51.0 ± 1.9 %<br>(100 $\mu$ M)             | [18] |
| 27. | 24-epi-7,8-didehydro-<br>cimigenol                                                                |  | <i>Cimicifuga dahu-<br/>rica</i> | 31.8 ± 0.5 %<br>(100 $\mu$ M)             | 41.1 ± 2.2 %<br>(100 $\mu$ M)             | [18] |
| 28. | 25-O-acetylcimigenol                                                                              |  | <i>Cimicifuga dahu-<br/>rica</i> | 15.8 ± 4.3 %<br>(100 $\mu$ M)             | 14.0 ± 2.6 %<br>(100 $\mu$ M)             | [18] |

|     |                                                                                |                                                                                     |                            |                                      |                                |      |
|-----|--------------------------------------------------------------------------------|-------------------------------------------------------------------------------------|----------------------------|--------------------------------------|--------------------------------|------|
| 29. | 24-epi-24-O-acetyl-7,8-didehydroshengmanol                                     | 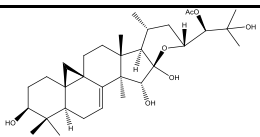   | <i>Cimicifuga dahurica</i> | 28.0 ± 4.0 %<br>(100 µM)             | 18.6 ± 0.3 %<br>(100 µM)       | [18] |
| 30. | 25-anhydrocimigenol                                                            |    | <i>Cimicifuga dahurica</i> | 42.8 ± 0.8 %<br>(100 µM)             | 44.9 ± 1.1 %<br>(100 µM)       | [18] |
| 31. | 25-O-acetyl-7,8-didehydrocimigenol-3-O-β-D-xylopyranoside                      |    | <i>Cimicifuga dahurica</i> | 24.9 ± 6.2 %<br>(100 µM)             | 55.0 ± 0.7 %<br>(100 µM)       | [18] |
| 32. | 25-anhydrocimigenol-3-O-β-D-xylopyranoside                                     |    | <i>Cimicifuga dahurica</i> | 37.1 ± 0.5 %<br>(100 µM)             | 60.7 ± 0.6 %<br>(100 µM)       | [18] |
| 33. | 24-epi-7,8-didehydrocimigenol-3-O-β-D-xylopyranoside                           |   | <i>Cimicifuga dahurica</i> | 19.0 ± 2.5 %<br>(100 µM)             | 62.0 ± 0.8 %<br>(100 µM)       | [18] |
| 34. | 3-O-β-D-xylopyranosyl-24S,25-dihydroxy-15-oxo-acta-(16R,23R)-16,23-monooxoside |  | <i>Cimicifuga dahurica</i> | 47.1 ± 1.6 %<br>(100 µM)             | 55.4 ± 0.8 %<br>(100 µM)       | [18] |
| 35. | Cimiricaside A                                                                 |  | <i>Cimicifuga dahurica</i> | 23.1 ± 6.8 %<br>(100 µM)             | 54.4 ± 1.3 %<br>(100 µM)       | [18] |
| 36. | 7,8-didehydro-25-anhydrocimigenol-3-O-β-D-xylopyranoside                       |  | <i>Cimicifuga dahurica</i> | 21.5 ± 1.7 %<br>(100 µM)             | 38.5 ± 0.1 %<br>(100 µM)       | [18] |
| 37. | (3β)-hopan-3-ol-28,22-olide                                                    |  | <i>Xylia xylocarpa</i>     | 79.5 ± 1.1 µM<br>(IC <sub>50</sub> ) | >100 µM<br>(IC <sub>50</sub> ) | [19] |
| 38. | lupeol                                                                         |  | <i>Xylia xylocarpa</i>     | 75.7 ± 3.1 µM<br>(IC <sub>50</sub> ) | >100 µM<br>(IC <sub>50</sub> ) | [19] |

|     |                                                   |                                                                                     |                                |                                    |                                     |      |
|-----|---------------------------------------------------|-------------------------------------------------------------------------------------|--------------------------------|------------------------------------|-------------------------------------|------|
| 39. | betulin                                           | 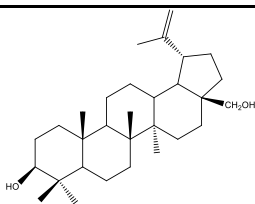   | <i>Xylia xylocarpa</i>         | 93.4 ± 2.2 µM (IC <sub>50</sub> )  | –                                   | [19] |
|     |                                                   |                                                                                     | <i>Garcinia hombro-niana</i>   | 28.5 ± 0.78 (IC <sub>50</sub> )    | –                                   | [20] |
| 40. | 28-norlup-20(29)-ene-3β-hydroxy-17β-hydroperoxide |    | <i>Xylia xylocarpa</i>         | 83.9 ± 0.6 µM (IC <sub>50</sub> )  | >100 µM (IC <sub>50</sub> )         | [19] |
| 41. | Betulinic acid                                    |    | <i>Xylia xylocarpa</i>         | 62.0 ± 2.2 µM (IC <sub>50</sub> )  | –                                   | [19] |
|     |                                                   |                                                                                     | <i>Garcinia hombro-niana</i>   | 24.2 ± 0.99 µM (IC <sub>50</sub> ) | 19.1 ± 1.33 µM (IC <sub>50</sub> )  | [20] |
| 42. | betulonic acid                                    |   | <i>Xylia xylocarpa</i>         | 94.6 ± 1.5 µM (IC <sub>50</sub> )  | >100 µM (IC <sub>50</sub> )         | [19] |
| 43. | oleanolic acid                                    |  | <i>Xylia xylocarpa</i>         | 84.9 ± 1.2 µM (IC <sub>50</sub> )  | >100 µM (IC <sub>50</sub> )         | [19] |
| 44. | 3β-formyloxy-18α-oleanano-28,19β-lactone          |  | <i>Xylia xylocarpa</i>         | 86.5 ± 0.6 µM (IC <sub>50</sub> )  | >100 µM (IC <sub>50</sub> )         | [19] |
| 45. | oleanane 3-(3'R-hydroxy)-hexadecanoate            |  | <i>Rhynchospora co-rymbosa</i> | –                                  | 66.49 ± 0.12 µM (IC <sub>50</sub> ) | [21] |
| 46. | dendrotriol                                       |  | <i>Rhynchospora co-rymbosa</i> | –                                  | 43.43 ± 0.47 µM (IC <sub>50</sub> ) | [21] |
| 47. | (24R)-24-ethyl-5α-cholestane-3β,5,6β-triol        |  | <i>Rhynchospora co-rymbosa</i> | –                                  | 79.44 ± 0.16 µM (IC <sub>50</sub> ) | [21] |

|     |                      |                                                                                     |                             |                                          |                                          |      |
|-----|----------------------|-------------------------------------------------------------------------------------|-----------------------------|------------------------------------------|------------------------------------------|------|
| 48. | (+)-Limonene         | 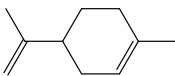   | <i>Pimpinella anisoides</i> | 225.9 ± 1.3<br>μg/mL (IC <sub>50</sub> ) | 456.2 ± 5.6<br>μg/mL (IC <sub>50</sub> ) | [22] |
| 49. | trans-Anethole       |    | <i>Pimpinella anisoides</i> | 134.7 ± 2.1<br>μg/mL (IC <sub>50</sub> ) | 209.6 ± 2.4<br>μg/mL (IC <sub>50</sub> ) | [22] |
| 50. | (+)-Sabinene         |    | <i>Pimpinella anisoides</i> | 176.5 ± 2.8<br>μg/mL (IC <sub>50</sub> ) | 218.6 ± 3.5<br>μg/mL (IC <sub>50</sub> ) | [22] |
| 51. | Cornigeraline        |    | <i>Cynara cornigera</i>     | 20.5 μM (IC <sub>50</sub> )              | -                                        | [23] |
| 52. | Solstitalin          |   | <i>Cynara cornigera</i>     | 35.8 μM (IC <sub>50</sub> )              | -                                        | [23] |
| 53. | 3-hydroxy-grosheimin |  | <i>Cynara cornigera</i>     | 30.5 μM (IC <sub>50</sub> )              | -                                        | [23] |
| 54. | grosheimin           |  | <i>Cynara cornigera</i>     | 61.8 μM (IC <sub>50</sub> )              | -                                        | [23] |
| 55. | solstitalin A        |  | <i>Cynara cornigera</i>     | 25.7 μM (IC <sub>50</sub> )              | -                                        | [23] |

|     |                        |                                                                                     |                         |                                              |                                             |      |
|-----|------------------------|-------------------------------------------------------------------------------------|-------------------------|----------------------------------------------|---------------------------------------------|------|
| 56. | 13-chlorosolstitialine | 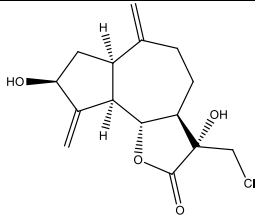   | <i>Cynara cornigera</i> | 62.1 $\mu$ M (IC <sub>50</sub> )             | -                                           | [23] |
| 57. | cyanaropicrin          |    | <i>Cynara cornigera</i> | 31.3 $\mu$ M (IC <sub>50</sub> )             | -                                           | [23] |
| 58. | Amberbin C             |   | <i>Amberboa ramosa</i>  | 1.1 $\pm$ 0.08 $\mu$ M (IC <sub>50</sub> )   | 17.9 $\pm$ 0.05 $\mu$ M (IC <sub>50</sub> ) | [24] |
| 59. | Amberin                |  | <i>Amberboa ramosa</i>  | 17.5 $\pm$ 0.01 $\mu$ M (IC <sub>50</sub> )  | 2.7 $\pm$ 0.02 $\mu$ M (IC <sub>50</sub> )  | [24] |
| 60. | Amberbin A             |  | <i>Amberboa ramosa</i>  | 8.6 $\pm$ 0.15 $\mu$ M (IC <sub>50</sub> )   | 4.8 $\pm$ 0.15 $\mu$ M (IC <sub>50</sub> )  | [24] |
| 61. | Amberbin B             |  | <i>Amberboa ramosa</i>  | 0.91 $\pm$ 0.015 $\mu$ M (IC <sub>50</sub> ) | 2.5 $\pm$ 0.15 $\mu$ M (IC <sub>50</sub> )  | [24] |
| 62. | gaillardin             |  | <i>Inula spp</i>        | 67 % (300 $\mu$ g/mL)                        | -                                           | [25] |

|     |                                                                                                          |                                                                                     |                           |                                             |                                  |      |
|-----|----------------------------------------------------------------------------------------------------------|-------------------------------------------------------------------------------------|---------------------------|---------------------------------------------|----------------------------------|------|
| 63. | britannin                                                                                                | 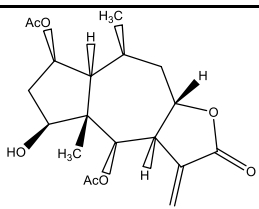   | <i>Inula spp</i>          | 25.2 % (300 $\mu$ g/mL)                     | -                                | [25] |
| 64. | Pulchellin C                                                                                             |    | <i>Inula spp</i>          | 10.9 % (300 $\mu$ g/mL)                     | -                                | [25] |
| 65. | 1 $\alpha$ ,6 $\beta$ ,8 $\alpha$ -Triacetox-9 $\beta$ -furoyloxy- $\beta$ -agarofuran                   |    | <i>Maytenus disticha</i>  | 0.098 $\pm$ 0.012 mg/mL (IC <sub>50</sub> ) | >0.500 mg/mL (IC <sub>50</sub> ) | [26] |
| 66. | 1 $\alpha$ -Hydroxy-6 $\beta$ ,8 $\alpha$ -diacetox-9 $\beta$ -furoyloxy- $\beta$ -agarofuran            |   | <i>Maytenus disticha</i>  | 0.341 $\pm$ 0.016 mg/mL (IC <sub>50</sub> ) | >0.500 mg/mL (IC <sub>50</sub> ) | [26] |
| 67. | 1 $\alpha$ ,6 $\beta$ -Diacetox-8 $\alpha$ -hydroxy-9 $\beta$ -furoyloxy- $\beta$ -agarofuran            |  | <i>Maytenus disticha</i>  | 0.102 $\pm$ 0.004 mg/mL (IC <sub>50</sub> ) | >0.500 mg/mL (IC <sub>50</sub> ) | [26] |
| 68. | 1 $\alpha$ -Acetox-6 $\beta$ ,8 $\alpha$ -dihydroxy-9 $\beta$ -furoyloxy- $\beta$ -agarofuran            |  | <i>Maytenus disticha</i>  | 0.097 $\pm$ 0.006 mg/mL (IC <sub>50</sub> ) | >0.500 mg/mL (IC <sub>50</sub> ) | [26] |
| 69. | 1 $\alpha$ ,2 $\alpha$ ,6 $\beta$ ,8 $\alpha$ ,15-Pentaacetox-9 $\beta$ -benzoyloxy- $\beta$ -agarofuran |  | <i>Euonymus japonicus</i> | 0.070 $\pm$ 0.002 mg/mL (IC <sub>50</sub> ) | >0.500 mg/mL (IC <sub>50</sub> ) | [26] |

|     |                                                                                                                      |                                                                                     |                                  |                                          |                                          |      |
|-----|----------------------------------------------------------------------------------------------------------------------|-------------------------------------------------------------------------------------|----------------------------------|------------------------------------------|------------------------------------------|------|
| 70. | 1 $\alpha$ ,2 $\alpha$ ,3 $\beta$ ,15-Tetraacetoxy-6 $\beta$ ,9 $\beta$ -dibenzoyl-8-oxo- $\beta$ -agarofuran        | 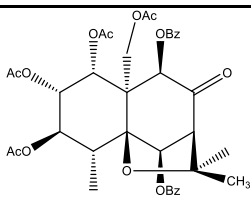   | <i>Maytenus disticha</i>         | 0.299 ± 0.015 mg/mL (IC <sub>50</sub> )  | >0.500 mg/mL (IC <sub>50</sub> )         | [26] |
| 71. | 1 $\alpha$ ,6 $\beta$ ,15-Triacetoxo-9-benzoyloxy- $\beta$ -agarofuran                                               |    | <i>Euonymus japonicus</i>        | 0.359 ± 0.006 mg/mL (IC <sub>50</sub> )  | >0.500 mg/mL (IC <sub>50</sub> )         | [26] |
| 72. | 2 $\alpha$ ,3 $\beta$ ,6 $\beta$ ,8 $\alpha$ ,15-Pentaacetoxo-1 $\alpha$ ,9 $\beta$ -benzoyloxy- $\beta$ -agarofuran |    | <i>Euonymus japonicus</i>        | 0.363 ± 0.009 mg/mL (IC <sub>50</sub> )  | >0.500 mg/mL (IC <sub>50</sub> )         | [26] |
| 73. | 1 $\alpha$ -Acetoxo-6 $\beta$ ,9 $\beta$ -difuroyloxy-4 $\beta$ -hydroxy- $\beta$ -agarofuran                        |   | <i>Maytenus disticha</i>         | 0.381 ± 0.007 mg/mL (IC <sub>50</sub> )  | >0.500 mg/mL (IC <sub>50</sub> )         | [26] |
| 74. | 2 $\beta$ -Hydroxy-3 $\alpha$ -O-caffeoyltaraxar-14-en-28-oic acid                                                   |  | <i>Garcinia hombro-niana</i>     | 13.5 ± 0.95 $\mu$ M (IC <sub>50</sub> )  | 10.6 ± 0.54 $\mu$ M (IC <sub>50</sub> )  | [20] |
| 75. | taraxerol                                                                                                            |  | <i>Garcinia hombro-niana</i>     | -                                        | 17.8 ± 1.73 $\mu$ M (IC <sub>50</sub> )  | [20] |
| 76. | Glycyrrhetic acid                                                                                                    |  | <i>Perovskia atriplic-ifolia</i> | 54.53 ± 0.05 $\mu$ M (IC <sub>50</sub> ) | 34.52 ± 0.04 $\mu$ M (IC <sub>50</sub> ) | [27] |
| 77. | 2 $\alpha$ ,3 $\beta$ -Dihydroxyolean-12-en-28-methyl ester                                                          |  | <i>Perovskia atriplic-ifolia</i> | 46.51 ± 0.05 $\mu$ M (IC <sub>50</sub> ) | 28.06 ± 0.06 $\mu$ M (IC <sub>50</sub> ) | [27] |

|     |                                                                                   |                                                                                     |                                 |                                          |                                          |      |
|-----|-----------------------------------------------------------------------------------|-------------------------------------------------------------------------------------|---------------------------------|------------------------------------------|------------------------------------------|------|
| 78. | 2 $\alpha$ ,3 $\beta$ -Dihydroxyolean-12-en-28-oic acid                           | 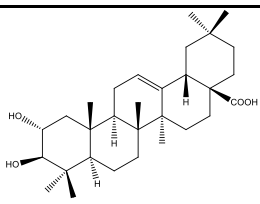   | <i>Perovskia atriplicifolia</i> | 33.50 ± 0.05 $\mu$ M (IC <sub>50</sub> ) | 19.04 ± 0.05 $\mu$ M (IC <sub>50</sub> ) | [27] |
| 79. | 2 $\alpha$ ,3 $\beta$ ,24-Trihydroxyolean-12-en-28-oic acid                       |    | <i>Perovskia atriplicifolia</i> | 24.57 ± 0.05 $\mu$ M (IC <sub>50</sub> ) | 9.50 ± 0.03 $\mu$ M (IC <sub>50</sub> )  | [27] |
| 80. | 2 $\alpha$ ,3 $\beta$ ,19 $\beta$ -Trihydroxyurs-12-en-28-oic acid                |    | <i>Perovskia atriplicifolia</i> | 29.54 ± 0.05 $\mu$ M (IC <sub>50</sub> ) | 13.52 ± 0.03 $\mu$ M (IC <sub>50</sub> ) | [27] |
| 81. | ursolic acid                                                                      |   | <i>Calceolaria talcana</i>      | -                                        | 168.1 $\mu$ g/mL (IC <sub>50</sub> )     | [28] |
| 82. | Lololide                                                                          |  | <i>Portulaca oleracea</i>       | 75.67 ± 0.37 $\mu$ M (IC <sub>50</sub> ) | -                                        | [29] |
| 83. | Isolololide                                                                       |  | <i>Portulaca oleracea</i>       | 76.41 ± 0.23 $\mu$ M (IC <sub>50</sub> ) | -                                        | [29] |
| 84. | Dehydrolololide                                                                   |  | <i>Portulaca oleracea</i>       | 78.74 ± 0.36 $\mu$ M (IC <sub>50</sub> ) | -                                        | [29] |
| 85. | 5,5,7,7,11,13-hexamethyl-2-(5-methylhexyl)icosahydro-1H-cyclopenta[a]chrysen-9-ol |  | <i>Grewia optiva</i>            | 90 $\mu$ g/mL (IC <sub>50</sub> )        | 90 $\mu$ g/mL (IC <sub>50</sub> )        | [30] |
| 86. | Columbin                                                                          |  | <i>Tinospora cordifolia</i>     | 1.2993 ± 0.17 mg/mL (IC <sub>50</sub> )  | -                                        | [31] |

|     |                                                                                                                                                |                                                                                     |                                     |                                       |                                           |      |
|-----|------------------------------------------------------------------------------------------------------------------------------------------------|-------------------------------------------------------------------------------------|-------------------------------------|---------------------------------------|-------------------------------------------|------|
| 87. | 5-allosyloxy-aucubine                                                                                                                          | 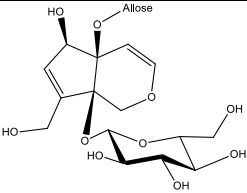   | <i>Sideritis germani-copolitana</i> | 20.36±0.70%<br>(250 µg/mL)            | 14.22±0.61<br>% (250<br>µg/mL)            | [32] |
| 88. | Melittoside                                                                                                                                    |    | <i>Sideritis germani-copolitana</i> | 24.63±0.44%<br>(250 µg/mL)            | 12.75±0.40<br>% (250<br>µg/mL)            | [32] |
| 89. | Ajugol                                                                                                                                         |    | <i>Sideritis germani-copolitana</i> | 21.29±0.48%<br>(250 µg/mL)            | 10.51±0.32<br>% (250<br>µg/mL)            | [32] |
| 90. | Friedeline                                                                                                                                     |   | <i>Celtis adolphi-friderici</i>     | -                                     | 62.3±0.21<br>µM (IC <sub>50</sub> )       | [33] |
| 91. | 3-O-[2'-(2''-O-glycolyl)-glyoxylyl-β-D-glucuronopyranosyl]-28-O-β-D-glucopyranosyl-olean-12-en-3β-ol-28-oic acid                               |  | <i>Bassia indica</i>                | 63.1±1.5 µg/mL<br>(IC <sub>50</sub> ) | -                                         | [34] |
| 92. | (2'R,3'S)-3-O-[2'-hydroxy-3'-(2''-O-glycolyl)-oxo-propionic acid-β-D-glucuronopyranosyl]-28-O-β-D-glucopyranosyl-olean-12-en-3β-ol-28-oic acid |  | <i>Bassia indica</i>                | 29.6±1.7 µg/mL<br>(IC <sub>50</sub> ) | -                                         | [34] |
| 93. | (1R,15R)-1-Acetoxycryptotanshinone                                                                                                             |  | <i>Perovskia atriplicifolia</i>     | 22.8±2.4% (10<br>µg/mL)               | 0.84±0.09<br>µg/mL<br>(IC <sub>50</sub> ) | [35] |

|      |                               |                                                                                     |                                 |                      |                                      |      |
|------|-------------------------------|-------------------------------------------------------------------------------------|---------------------------------|----------------------|--------------------------------------|------|
| 94.  | (1R)-1-Acetoxy-tanshinone IIA | 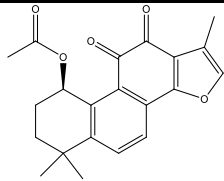   | <i>Perovskia atriplicifolia</i> | 28.0±0.9% (10 µg/mL) | 2.77±0.48 µg/mL (IC <sub>50</sub> )  | [35] |
| 95.  | (15R)-1-oxoaegyptinone A      |    | <i>Perovskia atriplicifolia</i> | 49.6±1.8% (10 µg/mL) | 15.75±1.12 µg/mL (IC <sub>50</sub> ) | [35] |
| 96.  | Isograndifoliol               |    | <i>Perovskia atriplicifolia</i> | 50.0±1.8% (10 µg/mL) | 0.27±0.02 µg/mL (IC <sub>50</sub> )  | [35] |
| 97.  | Tunisposin A                  |   | <i>Citharexylum spinosum</i>    | -                    | 30.79±1.21 µM (IC <sub>50</sub> )    | [36] |
| 98.  | Tunisposin B                  |  | <i>Citharexylum spinosum</i>    | -                    | 17.19±1.02 µM (IC <sub>50</sub> )    | [36] |
| 99.  | Tunisposin C                  |  | <i>Citharexylum spinosum</i>    | -                    | 52.24±2.50 µM (IC <sub>50</sub> )    | [36] |
| 100. | Tunisposin D                  |  | <i>Citharexylum spinosum</i>    | -                    | 35.89±1.17 µM (IC <sub>50</sub> )    | [36] |

|      |                                                            |                                                                                     |                         |                                        |                                         |      |
|------|------------------------------------------------------------|-------------------------------------------------------------------------------------|-------------------------|----------------------------------------|-----------------------------------------|------|
| 101. | <i>E</i> -6-O- <i>p</i> -coumaroyl scandoside methyl ester | 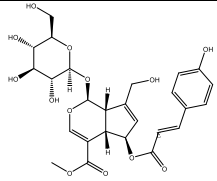   | <i>Hedyotis diffusa</i> | 304.18±12.15<br>μM (IC <sub>50</sub> ) | 98.96±2.74<br>μM (IC <sub>50</sub> )    | [37] |
| 102. | 6-O- <i>p</i> -coumaroyl scandoside methyl ester           |    | <i>Hedyotis diffusa</i> | 297.84±22.68<br>μM (IC <sub>50</sub> ) | 26.22±1.76<br>μM (IC <sub>50</sub> )    | [37] |
| 103. | <i>E</i> -6-O-feruloyl scandoside methyl ester             |    | <i>Hedyotis diffusa</i> | 96.84±5.29 μM<br>(IC <sub>50</sub> )   | 116.09±29.3<br>9 μM (IC <sub>50</sub> ) | [37] |
| 104. | Deacetylasperulosidic acid methyl ester                    |   | <i>Hedyotis diffusa</i> | 172.26±20.55<br>μM (IC <sub>50</sub> ) | 17.59±0.78<br>μM (IC <sub>50</sub> )    | [37] |
| 105. | Asperuloside                                               |  | <i>Hedyotis diffusa</i> | 258.81±7.48 μM<br>(IC <sub>50</sub> )  | >500 μM<br>(IC <sub>50</sub> )          | [37] |
| 106. | 6-O-Methyldeacetylasperulosidic acid methyl ester          |  | <i>Hedyotis diffusa</i> | 81.06±5.58 μM<br>(IC <sub>50</sub> )   | 32.24±2.80<br>μM (IC <sub>50</sub> )    | [37] |
| 107. | 6-O-Methylscandoside methyl ester                          |  | <i>Hedyotis diffusa</i> | -                                      | 11.59±0.68<br>μM (IC <sub>50</sub> )    | [37] |

|      |                         |                                                                                     |                                    |                                        |                                       |      |
|------|-------------------------|-------------------------------------------------------------------------------------|------------------------------------|----------------------------------------|---------------------------------------|------|
| 108. | scandoside methyl ester | 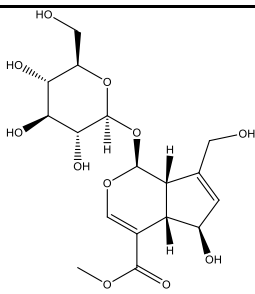   | <i>Hedyotis diffusa</i>            | 157.68±13.18<br>μM (IC <sub>50</sub> ) | 16.18±2.05<br>μM (IC <sub>50</sub> )  | [37] |
| 109. | asperulosidic acid      |    | <i>Hedyotis diffusa</i>            | 68.34±5.11 μM<br>(IC <sub>50</sub> )   | 80.29±19.76<br>μM (IC <sub>50</sub> ) | [37] |
| 110. | Rhotomentodione D       |   | <i>Rhodomyrtus tomentosa</i>       | 22.9±1.1 μM<br>(IC <sub>50</sub> )     | -                                     | [38] |
| 111. | Paecilacadinol A        |  | <i>Paecilomyces sp.</i><br>TE-540  | 27.05±3.21% (40<br>μM)                 | -                                     | [39] |
| 112. | Paecilacadinol B        |  | <i>Paecilomyces sp.</i><br>TE-540  | 34.23±1.15% (40<br>μM)                 | -                                     | [39] |
| 113. | Ustusol D               |  | <i>Paecilomyces sp.</i><br>TE-540  | 27.29±2.07% (40<br>μM)                 | -                                     | [39] |
| 114. | Ustusol E               |  | <i>Paecilomyces sp.</i><br>TE-540  | 41.35±0.65% (40<br>μM)                 | -                                     | [39] |
| 115. | 12-hydroxyalbrassitriol |  | <i>Paecilomyces sp.</i><br>TE-540. | 43.02±6.01 μM<br>(IC <sub>50</sub> )   | -                                     | [39] |

|      |                                     |                                                                                     |                                      |                                      |   |      |
|------|-------------------------------------|-------------------------------------------------------------------------------------|--------------------------------------|--------------------------------------|---|------|
| 116. | 2-hydroxyalbrassitriol              | 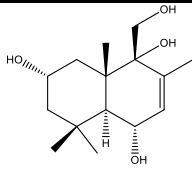   | <i>Paecilomyces sp.</i><br>TE-540    | 35.97±2.12 µM<br>(IC <sub>50</sub> ) | - | [39] |
| 117. | Deoxyuvidin B                       |    | <i>Paecilomyces sp.</i><br>TE-540    | 19.23±1.89% (40 µM)                  | - | [39] |
| 118. | 3β,9α,11-trihydroxy-6-oxodrim-7-ene |    | <i>Paecilomyces sp.</i><br>TE-540    | 33.04±4.30% (40 µM)                  | - | [39] |
| 119. | 2α,11-dihydroxy-6-oxodrim-7-ene     |    | <i>Paecilomyces sp.</i><br>TE-540sp. | 17.56±3.33% (40 µM)                  | - | [39] |
| 120. | Ustusol B                           |  | <i>Paecilomyces sp.</i><br>TE-540    | 24.24±1.35% (40 µM)                  | - | [39] |
| 121. | kadcocclactone S                    |  | <i>Kadsura coccinea</i>              | 85.91±1.90 µM<br>(IC <sub>50</sub> ) | - | [40] |
| 122. | micrandilactone C                   |  | <i>Kadsura coccinea</i>              | 97.90±1.50 µM<br>(IC <sub>50</sub> ) | - | [40] |
| 123. | micrandiactone H                    |  | <i>Kadsura coccinea</i>              | 86.99±1.04 µM<br>(IC <sub>50</sub> ) | - | [40] |
| 124. | seco-coccinic acid A                |  | <i>Kadsura coccinea</i>              | 91.14±2.73 µM<br>(IC <sub>50</sub> ) | - | [40] |
| 125. | seco-coccinic acid G                |  | <i>Kadsura coccinea</i>              | 73.16±1.78 µM<br>(IC <sub>50</sub> ) | - | [40] |

|      |                                          |                                                                                     |                             |                                  |   |      |
|------|------------------------------------------|-------------------------------------------------------------------------------------|-----------------------------|----------------------------------|---|------|
| 126. | sandaracopimaric acid                    | 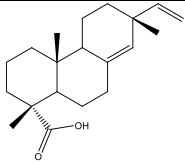   | <i>Cupressus macrocarpa</i> | 195.99 µg/mL (IC <sub>50</sub> ) | - | [41] |
| 127. | Agathadiol                               |    | <i>Cupressus macrocarpa</i> | 228.47 µg/mL (IC <sub>50</sub> ) | - | [41] |
| 128. | 3-O-detigloyl-3-O-isobutyrylfebrifugin A |    | <i>Cipadessa baccifera</i>  | 25.69±1.84% (50 µM)              | - | [42] |
| 129. | Granatumin E                             |   | <i>Cipadessa baccifera</i>  | 23.98±1.55% (50 µM)              | - | [42] |
| 130. | Khaysin T                                |  | <i>Cipadessa baccifera</i>  | 25.13±3.55% (50 µM)              | - | [42] |
| 131. | 2'S-cipadesin A                          |  | <i>Cipadessa baccifera</i>  | 38.76±4.33% (50 µM)              | - | [42] |

Table S 2: Phenolic compounds as Acetyl and Butyryl cholinesterase inhibitors

| Number | Name      | Structure                                                                           | Plant source                   | IC <sub>50</sub> or %inh (conc.)       |                                     | Reference |
|--------|-----------|-------------------------------------------------------------------------------------|--------------------------------|----------------------------------------|-------------------------------------|-----------|
|        |           |                                                                                     |                                | AChE                                   | BChE                                |           |
| 1.     | Quercetin | 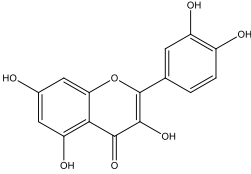   | <i>Aristotelia chilensis</i>   | 47.8 µg/mL (IC <sub>50</sub> )         | 38.8 µg/mL (IC <sub>50</sub> )      | [43]      |
|        |           |                                                                                     | <i>Eugenia dysenterica</i>     | 46.59±0.49 µg/mL (IC <sub>50</sub> )   | -                                   | [44]      |
|        |           |                                                                                     | <i>Leiotulus dasyanthus</i>    | -                                      | 6.98 ± 3.01 % (20 µg/mL)            | [45]      |
|        |           |                                                                                     | <i>Cleistocalyx perculatus</i> | 25.9 ± 1.7 µM (IC <sub>50</sub> )      | 177.8 ± 11.9 µM (IC <sub>50</sub> ) | [46]      |
|        |           |                                                                                     | <i>Bassia indica</i>           | 18±1.3 µg/mL (IC <sub>50</sub> )       | -                                   | [34]      |
| 2.     | Myricetin |  | <i>Aristotelia chilensis</i>   | 37.2 µg/mL (IC <sub>50</sub> )         | 70.7 µg/mL (IC <sub>50</sub> )      | [43]      |
| 3.     | Rhamnetin |  | <i>Aristotelia chilensis</i>   | 89.9 µg/mL (IC <sub>50</sub> )         | 7.8 µg/mL (IC <sub>50</sub> )       | [43]      |
| 4.     | Apigenin  |  | <i>Aristotelia chilensis</i>   | 19.7 µg/mL (IC <sub>50</sub> )         | 24.5 µg/mL (IC <sub>50</sub> )      | [43]      |
|        |           |                                                                                     | <i>Thunbergia erecta</i>       | 37.33 ± 4.02 ng/mL (IC <sub>50</sub> ) | -                                   | [47]      |
|        |           |                                                                                     | <i>Helichrysum plicatum</i>    | 1.78 µM (IC <sub>50</sub> )            | 1.88 µM (IC <sub>50</sub> )         | [48]      |
| 5.     | Luteolin  |  | <i>Aristotelia chilensis</i>   | 15.9 µg/mL (IC <sub>50</sub> )         | 49.8 µg/mL (IC <sub>50</sub> )      | [43]      |
|        |           |                                                                                     | <i>Achillea millefolium</i>    | 2.12 ± 0.145 µM (IC <sub>50</sub> )    | 2.45 ± 0.099 µM (IC <sub>50</sub> ) | [49]      |

|     |                                     |                                                                                     |                                |                                                          |                                                            |      |
|-----|-------------------------------------|-------------------------------------------------------------------------------------|--------------------------------|----------------------------------------------------------|------------------------------------------------------------|------|
| 6.  | Tamarixetin                         | 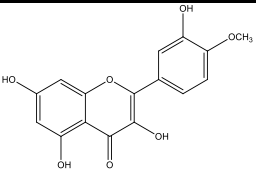   | <i>Cleistocalyx perculatus</i> | $22.3 \pm 2.2 \mu\text{M}$<br>(IC <sub>50</sub> )        | $160.6 \pm 3.8 \mu\text{M}$<br>(IC <sub>50</sub> )         | [46] |
| 7.  | Kaempferol                          |    | <i>Cleistocalyx perculatus</i> | $30.4 \pm 2.2 \mu\text{M}$<br>(IC <sub>50</sub> )        | $62.5 \pm 1.3 \mu\text{M}$<br>(IC <sub>50</sub> )          | [46] |
|     |                                     |                                                                                     | <i>Eupatorium adenophorum</i>  | $24.92 \pm 0.49$<br>$\mu\text{g/mL}$ (IC <sub>50</sub> ) | -                                                          | [50] |
| 8.  | Santin                              |    | <i>Dodonaea viscosa</i>        | $>300 \mu\text{M}$ (IC <sub>50</sub> )                   | $274.07 \pm 1.68$<br>$\mu\text{M}$ (IC <sub>50</sub> )     | [51] |
| 9.  | Penduletin                          |    | <i>Dodonaea viscosa</i>        | $175.11 \pm 1.36$<br>$\mu\text{M}$ (IC <sub>50</sub> )   | $55.78 \pm 1.01$<br>$\mu\text{M}$ (IC <sub>50</sub> )      | [51] |
| 10. | Viscosine                           |   | <i>Dodonaea viscosa</i>        | $182.97 \pm 1.25$<br>$\mu\text{M}$ (IC <sub>50</sub> )   | $47.07 \pm 0.54$<br>$\mu\text{M}$ (IC <sub>50</sub> )      | [51] |
| 11. | 6,7-dimethylkaempferol              |  | <i>Dodonaea viscosa</i>        | $>300 \mu\text{M}$ (IC <sub>50</sub> )                   | $145.65 \pm 1.45$<br>$\mu\text{M}$ (IC <sub>50</sub> )     | [51] |
| 12. | Kaempferol-3-methylether            |  | <i>Dodonaea viscosa</i>        | $270.25 \pm 1.16$<br>$\mu\text{M}$                       | $115.97 \pm 1.18$<br>$\mu\text{M}$                         | [51] |
| 13. | 3,4'-dimethoxy-5,7-dihydroxyflavone |  | <i>Dodonaea viscosa</i>        | $>300 \mu\text{M}$ (IC <sub>50</sub> )                   | $298.40 \pm 2.01$<br>$\mu\text{M}$ (IC <sub>50</sub> )     | [51] |
| 14. | Kaempferide                         |  | <i>Alpinia officinarum</i>     | $31.9 \pm 2.0 \mu\text{M}$<br>(IC <sub>50</sub> )        | $47.6 \pm 1.6$ (100<br>$\mu\text{M}$ ) (IC <sub>50</sub> ) | [52] |
| 15. | Galangin                            |  | <i>Alpinia officinarum</i>     | $70.1 \pm 1.5 \mu\text{M}$<br>(IC <sub>50</sub> )        | $61.4 \pm 1.4 \mu\text{M}$<br>(IC <sub>50</sub> )          | [52] |

|     |                                                         |                                                                                     |                                |                                       |                                       |      |
|-----|---------------------------------------------------------|-------------------------------------------------------------------------------------|--------------------------------|---------------------------------------|---------------------------------------|------|
| 16. | Acacetin                                                | 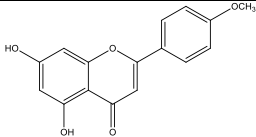   | <i>Aristotelia chilensis</i>   | 112.3 µg/mL<br>(IC <sub>50</sub> )    | 177.8 µg/mL<br>(IC <sub>50</sub> )    | [43] |
| 17. | Diosmetin                                               |    | <i>Aristotelia chilensis</i>   | 45.6 µg/mL<br>(IC <sub>50</sub> )     | 12.9 µg/mL<br>(IC <sub>50</sub> )     | [43] |
| 18. | Cirsilineol                                             |    | <i>Ocimum sanctum</i>          | 2.95 ± 0.02 µM<br>(IC <sub>50</sub> ) | 3.25 ± 0.08 µM<br>(IC <sub>50</sub> ) | [53] |
| 19. | Isothymusin                                             |    | <i>Ocimum sanctum</i>          | 8.25 ± 0.13 µM<br>(IC <sub>50</sub> ) | 7.85 ± 0.01 µM<br>(IC <sub>50</sub> ) | [53] |
| 20. | Myricetin-3'-methylether 3-O-β-D-galactopyranoside      |   | <i>Cleistocalyx perculatus</i> | 19.9 ± 0.6 µM<br>(IC <sub>50</sub> )  | 152.5 ± 0.4 µM<br>(IC <sub>50</sub> ) | [46] |
| 21. | Myricetin-3',5'-dimethylether 3-O-β-D-galactopyranoside |  | <i>Cleistocalyx perculatus</i> | 37.8 ± 1.0 µM<br>(IC <sub>50</sub> )  | > 800 µM (IC <sub>50</sub> )          | [46] |
| 22. | Quercitrin                                              |  | <i>Aristotelia chilensis</i>   | 66.9 µg/mL<br>(IC <sub>50</sub> )     | 78.8 µg/mL<br>(IC <sub>50</sub> )     | [43] |
| 23. | Rutin                                                   |  | <i>Aristotelia chilensis</i>   | 169.8 µg/mL<br>(IC <sub>50</sub> )    | 95.1 µg/mL<br>(IC <sub>50</sub> )     | [43] |
|     |                                                         |                                                                                     | <i>Leiotulus dasyanthus</i>    | -                                     | 5.95 ± 1.09 %<br>(20 µg/mL)           | [45] |

|     |                                       |  |                               |                                         |                                        |      |
|-----|---------------------------------------|--|-------------------------------|-----------------------------------------|----------------------------------------|------|
|     |                                       |  | <i>Eupatorium adenophorum</i> | 66.97±0.15<br>μg/mL (IC <sub>50</sub> ) | -                                      | [50] |
| 24. | Isoorientin-6-O''-β-D-glucopyranoside |  | <i>Iris pseudopumila</i>      | 60.8±1.8 μM<br>(IC <sub>50</sub> )      | 98.9±1.4 μM<br>(IC <sub>50</sub> )     | [54] |
| 25. | Isovitexin-6-O''-β-D-glucopyranoside  |  | <i>Iris pseudopumila</i>      | 85.9±3.6 μM<br>(IC <sub>50</sub> )      | >100 μM (IC <sub>50</sub> )            | [54] |
| 26. | kaempferol-3-O-β-D-glucopyranoside    |  | <i>Iris pseudopumila</i>      | 50.4±1.4 μM<br>(IC <sub>50</sub> )      | 76.8±1.7 μM<br>(IC <sub>50</sub> )     | [54] |
|     |                                       |  | <i>Eupatorium adenophorum</i> | 61.44±1.81<br>μg/mL (IC <sub>50</sub> ) | -                                      | [50] |
| 27. | Apigenin-7-O-β-D-glucoside            |  | <i>Achillea millefolium</i>   | 1.89 ± 0.067<br>μM (IC <sub>50</sub> )  | 2.13 ± 0.440<br>μM (IC <sub>50</sub> ) | [49] |
| 28. | Luteolin 7-O-β-D-glucoside            |  | <i>Achillea millefolium</i>   | 1.67 ± 0.302<br>μM (IC <sub>50</sub> )  | 2.20 ± 0.058<br>μM (IC <sub>50</sub> ) | [49] |
| 29. | 6-OH-luteolin 7-O-β-D-glucoside       |  | <i>Achillea millefolium</i>   | 1.65 ± 0.122<br>μM (IC <sub>50</sub> )  | 1.97 ± 0.220<br>μM (IC <sub>50</sub> ) | [49] |
| 30. | Isoorientin                           |  | <i>Iris pseudopumila</i>      | 26.8±0.8 μM<br>(IC <sub>50</sub> )      | 31.5±0.7 μM<br>(IC <sub>50</sub> )     | [54] |
| 31. | Isovitexin                            |  | <i>Iris pseudopumila</i>      | 36.4±2.1 μM<br>(IC <sub>50</sub> )      | 54.8±2.5 μM<br>(IC <sub>50</sub> )     | [54] |

|     |                                                                                                     |                                                                                     |                                     |                             |                                         |      |
|-----|-----------------------------------------------------------------------------------------------------|-------------------------------------------------------------------------------------|-------------------------------------|-----------------------------|-----------------------------------------|------|
| 32. | kaempferol<br>3-O-(3''-O-E-<br>p-couma-<br>royl)-(6''-O-<br>E-feruloyl)-β-<br>glucopyra-<br>noside  | 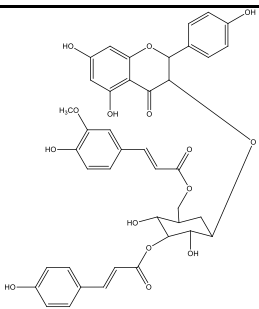   | <i>Stenochlaena palus-<br/>tris</i> | -                           | 113.66 ± 7.66<br>μM (IC <sub>50</sub> ) | [55] |
| 33. | kaempferol<br>3-O-(3'',6''-<br>di-O-E-p-<br>coumaroyl)-<br>β-glucopyra-<br>noside                   |    | <i>Stenochlaena palus-<br/>tris</i> | -                           | 85.37 ± 7.62<br>μM (IC <sub>50</sub> )  | [55] |
| 34. | 8-<br>prenylnaring-<br>enin                                                                         |   | <i>Humulus lupulus</i>              | 28.15 ± 1.38 %<br>(100 μM)  | 54.05 ± 2.89 %<br>(100 μM)              | [56] |
| 35. | 5,7,4'-trihy-<br>droxy-3'-(3-<br>hy-<br>droxymethyl<br>butyl)-3,6-di-<br>methoxyfla-<br>vone        |  | <i>Dodonaea viscosa</i>             | >300 μM (IC <sub>50</sub> ) | 222.54 ± 1.64<br>μM (IC <sub>50</sub> ) | [51] |
| 36. | 5,7-dihy-<br>droxy-3'-(2-<br>hydroxy-3-<br>methyl-3-bu-<br>tenyl)-3,6,4'-<br>trimethoxy-<br>flavone |  | <i>Dodonaea viscosa</i>             | >300 μM (IC <sub>50</sub> ) | >300 μM (IC <sub>50</sub> )             | [51] |
| 37. | 5,7-dihy-<br>droxy-3'-(3-<br>hydroxy-<br>methyl-<br>butyl)-3,6,4'-<br>trimethox-<br>yflavone        |  | <i>Dodonaea viscosa</i>             | >300 μM (IC <sub>50</sub> ) | 192.60 ± 1.96<br>μM (IC <sub>50</sub> ) | [51] |

|     |                                                                          |                                                                                     |                               |                                                    |                                                     |      |
|-----|--------------------------------------------------------------------------|-------------------------------------------------------------------------------------|-------------------------------|----------------------------------------------------|-----------------------------------------------------|------|
| 38. | 5,7-dihydroxy-3'-(4''-acetoxy-3''-methylbutyl)-3,6,4'-trimethoxy flavone | 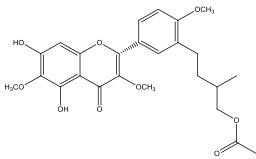   | <i>Dodonaea viscosa</i>       | >300 $\mu\text{M}$ ( $\text{IC}_{50}$ )            | >300 $\mu\text{M}$ ( $\text{IC}_{50}$ )             | [51] |
| 39. | Triacetyl triclin                                                        |    | <i>Rhynchospora corymbosa</i> | -                                                  | 67.36 $\pm$ 0.84 $\mu\text{M}$ ( $\text{IC}_{50}$ ) | [21] |
| 40. | Diacetyl triclin                                                         |    | <i>Rhynchospora corymbosa</i> | -                                                  | 58.91 $\pm$ 0.43 $\mu\text{M}$ ( $\text{IC}_{50}$ ) | [21] |
| 41. | Monoacetyl triclin                                                       |   | <i>Rhynchospora corymbosa</i> | -                                                  | 24.25 $\pm$ 0.21 $\mu\text{M}$ ( $\text{IC}_{50}$ ) | [21] |
| 42. | p-Hydroxybenzoic acid                                                    |  | <i>Nelumbo nucifera</i>       | 20.07 $\pm$ 0.07 % (10 $\mu\text{g/mL}$ )          | 62.29 $\pm$ 1.18 % (10 $\mu\text{g/mL}$ )           | [17] |
| 43. | Gallic acid                                                              |  | <i>Orostachys japonicus</i>   | 185.2 $\pm$ 2.1 $\mu\text{M}$ ( $\text{IC}_{50}$ ) | 1000 $\mu\text{M}$ ( $\text{IC}_{50}$ )             | [57] |
| 44. | Ferulic acid methyl ester                                                |  | <i>Cimicifuga dahurica</i>    | 58.0 $\pm$ 0.6 % (100 $\mu\text{M}$ )              | 62.3 $\pm$ 0.3 % (100 $\mu\text{M}$ )               | [18] |
| 45. | methyl galate                                                            |  | <i>Orostachys japonicus</i>   | 171.2 $\pm$ 1.5 $\mu\text{M}$ ( $\text{IC}_{50}$ ) | 1000 $\mu\text{M}$ ( $\text{IC}_{50}$ )             | [57] |
| 46. | vanilloloside                                                            |  | <i>Nelumbo nucifera</i>       | 4.55 $\pm$ 0.72 % (10 $\mu\text{g/mL}$ )           | 205.78 $\pm$ 0.79 % (10 $\mu\text{g/mL}$ )          | [17] |
| 47. | 4-O-caffeoyl-quinic acid                                                 |  | <i>Acanthopanax henryi</i>    | 80.2 $\pm$ 2.2 $\mu\text{M}$ ( $\text{IC}_{50}$ )  | -                                                   | [58] |

|     |                                                                                   |                                                                                     |                                      |                                           |                                      |      |
|-----|-----------------------------------------------------------------------------------|-------------------------------------------------------------------------------------|--------------------------------------|-------------------------------------------|--------------------------------------|------|
| 48. | 4,5-di-<br>caffeoylquini-<br>c acid                                               | 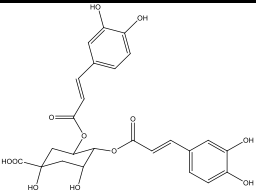   | <i>Acanthopanax henryi</i>           | 62.6 ± 8.3 μM<br>(IC <sub>50</sub> )      | -                                    | [58] |
| 49. | Piceatannol                                                                       |    | <i>Belamcandae chinensis rhizoma</i> | 67.07 ± 1.52 %<br>(100 μg/mL)             | 91.10 ± 1.26 %<br>(100 μg/mL)        | [59] |
| 50. | Resveratrol                                                                       |    | <i>Belamcandae chinensis rhizoma</i> | 14.43 ± 1.46 %<br>(100 μg/mL)             | 56.30 ± 2.33 %<br>(100 μg/mL)        | [59] |
|     |                                                                                   |                                                                                     | <i>Rheum lhasaense</i>               | 1709 ± 56.56 μM<br>(IC <sub>50</sub> )    | -                                    | [60] |
| 51. | Cimicifuge-<br>none                                                               |    | <i>Cimicifuga dahurica</i>           | 65.4 ± 0.9 %<br>(100 μM)                  | 13.6 ± 0.7 %<br>(100 μM)             | [18] |
| 52. | Rosmarinic acid                                                                   |   | <i>Perovskia atriplicifolia</i>      | 28.18 ± 5.13 %<br>(10 μg/mL)              | 80.74 ± 4.03 %<br>(10 μg/mL)         | [16] |
| 53. |                                                                                   |                                                                                     | <i>Thunbergia erecta</i>             | 83.02 ± 4.74<br>ng/mL (IC <sub>50</sub> ) | -                                    | [47] |
| 54. | (4E)-1,7-di-<br>phenyl-4-<br>hepten-3-one                                         |  | <i>Alpinia officinarum</i>           | 23.9 ± 2.6 μM<br>(IC <sub>50</sub> )      | 70.7 ± 2.5 μM<br>(IC <sub>50</sub> ) | [52] |
| 55. | (4E)-7-(4-hy-<br>droxy-<br>phenyl)-<br>1-phenyl-4-<br>hepten-3-one                |  | <i>Alpinia officinarum</i>           | 87.3 ± 3.4 μM<br>(IC <sub>50</sub> )      | 41.1 ± 0.1 %<br>(100 μM)             | [52] |
| 56. | (4E)-7-(4-hy-<br>droxy-3-<br>methoxy-<br>phenyl)-1-<br>phenyl-hept-<br>4-en-3-one |  | <i>Alpinia officinarum</i>           | 39.1 ± 2.3 μM<br>(IC <sub>50</sub> )      | 43.7 ± 1.4 %<br>(100 μM)             | [52] |
| 57. | Dihy-<br>drodash-<br>sbushiketol                                                  |  | <i>Alpinia officinarum</i>           | 36.2 ± 1.9 %<br>(100 μM)                  | 15.7 ± 2.1 %<br>(100 μM)             | [52] |
| 58. | (5R)-7-(4-hy-<br>droxy-3-<br>methoxy-<br>phenyl)-5-<br>methoxy-1-                 |  | <i>Alpinia officinarum</i>           | 35.3 ± 1.0 %<br>(100 μM)                  | 21.5 ± 0.6 %<br>(100 μM)             | [52] |

|     |                         |                                                                                     |                                      |                                                    |                                                  |      |
|-----|-------------------------|-------------------------------------------------------------------------------------|--------------------------------------|----------------------------------------------------|--------------------------------------------------|------|
|     | phenyl-3-heptanone      |                                                                                     |                                      |                                                    |                                                  |      |
| 59. | malabaricone E          | 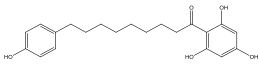   | <i>Myristica cin-namomea</i>         | $6.44 \pm 0.85 \mu\text{M}$ (IC <sub>50</sub> )    | $6.65 \pm 0.13 \mu\text{M}$ (IC <sub>50</sub> )  | [61] |
| 60. | Malabar-<br>icones A    |    | <i>Myristica cin-namomea</i>         | $1.31 \pm 0.17 \mu\text{M}$ (IC <sub>50</sub> )    | $39.21 \pm 3.46 \mu\text{M}$ (IC <sub>50</sub> ) | [61] |
| 61. | Malabar-<br>icones B    |    | <i>Myristica cin-namomea</i>         | $1.84 \pm 0.19 \mu\text{M}$ (IC <sub>50</sub> )    | $1.76 \pm 0.21 \mu\text{M}$ (IC <sub>50</sub> )  | [61] |
| 62. | Malabaricone C          |    | <i>Myristica cin-namomea</i>         | $1.94 \pm 0.27 \mu\text{M}$ (IC <sub>50</sub> )    | $2.80 \pm 0.49 \mu\text{M}$ (IC <sub>50</sub> )  | [61] |
|     |                         |                                                                                     | <i>Myristica fragrans</i>            | $2.06 \pm 0.04 \mu\text{g/mL}$ (IC <sub>50</sub> ) | -                                                | [62] |
| 63. | Maingayones A           |    | <i>Myristica cin-namomea</i>         | $12.66 \pm 1.48 \mu\text{M}$ (IC <sub>50</sub> )   | $10.51 \pm 2.07 \mu\text{M}$ (IC <sub>50</sub> ) | [61] |
| 64. | Maingayones B           |   | <i>Myristica cin-namomea</i>         | $30.67 \pm 8.14 \mu\text{M}$ (IC <sub>50</sub> )   | $12.52 \pm 2.86 \mu\text{M}$ (IC <sub>50</sub> ) | [61] |
| 65. | (-)-alpininoid B        |  | <i>Alpinia officinarum</i>           | $2.6 \pm 4.2 \mu\text{M}$ (IC <sub>50</sub> )      | $35.2 \pm 0.7 \mu\text{M}$ (IC <sub>50</sub> )   | [52] |
| 66. | Tectorigenin            |  | <i>Belamcandae chinensis rhizoma</i> | -                                                  | $18.08 \pm 2.93 \%$ (100 $\mu\text{g/mL}$ )      | [59] |
| 67. | Iristectori-<br>genin B |  | <i>Belamcandae chinensis rhizoma</i> | -                                                  | $37.07 \pm 0.47 \%$ (100 $\mu\text{g/mL}$ )      | [59] |
| 68. | Irigenin                |  | <i>Belamcandae chinensis rhizoma</i> | -                                                  | $20.12 \pm 2.47 \%$ (100 $\mu\text{g/mL}$ )      | [59] |
| 69. | Irilin B                |  | <i>Belamcandae chinensis rhizoma</i> | $3.67 \pm 1.44 \%$ (100 $\mu\text{g/mL}$ )         | $49.72 \pm 2.83 \%$ (100 $\mu\text{g/mL}$ )      | [59] |
| 70. | Iridin                  |  | <i>Belamcandae chinensis rhizoma</i> | -                                                  | $4.29 \pm 2.04 \%$ (100 $\mu\text{g/mL}$ )       | [59] |

|     |                                    |  |                                      |                                         |                                       |      |
|-----|------------------------------------|--|--------------------------------------|-----------------------------------------|---------------------------------------|------|
| 71. | Iristectorin B                     |  | <i>Belamcandae chinensis rhizoma</i> | -                                       | 9.44 ± 0.09 %<br>(100 µg/mL)          | [59] |
| 72. | Irisflorentin                      |  | <i>Belamcandae chinensis rhizoma</i> | 36.25 ± 1.22 %<br>(100 µg/mL)           | 9.34 ± 2.21 %<br>(100 µg/mL)          | [59] |
| 73. | Irilone                            |  | <i>Iris pseudopumila</i>             | 93.6±2.4 µM<br>(IC <sub>50</sub> )      | >100 µM (IC <sub>50</sub> )           | [54] |
| 74. | Irigenin-7-O-β-D-glucopyranoside   |  | <i>Iris pseudopumila</i>             | 94.1±2.5 µM<br>(IC <sub>50</sub> )      | >100 µM (IC <sub>50</sub> )           | [54] |
| 75. | Irisolone-4'-O-β-D-glucopyranoside |  | <i>Iris pseudopumila</i>             | 93.2±2.6 µM<br>(IC <sub>50</sub> )      | >100 µM (IC <sub>50</sub> )           | [54] |
| 76. | Osajin                             |  | <i>Maclura pomifera</i>              | 2.239 mM<br>(IC <sub>50</sub> )         | -                                     | [63] |
| 77. | Pomiferin                          |  | <i>Maclura pomifera</i>              | 0.096 mM<br>(IC <sub>50</sub> )         | -                                     | [63] |
| 78. | Iso-osajin                         |  | <i>Maclura pomifera</i>              | 1.35 mM (IC <sub>50</sub> )             | -                                     | [63] |
| 79. | Iso-pomiferin                      |  | <i>Maclura pomifera</i>              | 2.67 mM (IC <sub>50</sub> )             | -                                     | [63] |
| 80. | Catechin                           |  | <i>Eugenia dysenterica</i>           | 42.39±0.67<br>µg/mL (IC <sub>50</sub> ) | -                                     | [44] |
|     |                                    |  | <i>Kadsura coccinea</i>              | 7.58±2.45 µM<br>(IC <sub>50</sub> )     | -                                     | [40] |
| 81. | (+)-catechin                       |  | <i>Orostachys japonicus</i>          | 191.2 ± 1.3 µM<br>(IC <sub>50</sub> )   | 727.3 ± 2.1 µM<br>(IC <sub>50</sub> ) | [57] |

|     |                                                           |                                                                                     |                               |                                                        |                                                     |      |
|-----|-----------------------------------------------------------|-------------------------------------------------------------------------------------|-------------------------------|--------------------------------------------------------|-----------------------------------------------------|------|
| 82. | (-)-epicatechin-3-O-gallate                               | 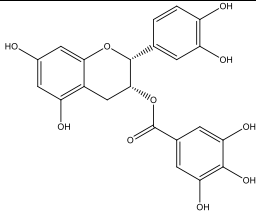   | <i>Orostachys japonicus</i>   | $328.1 \pm 2.1 \mu\text{M}$<br>(IC <sub>50</sub> )     | $412.5 \pm 1.2 \mu\text{M}$<br>(IC <sub>50</sub> )  | [57] |
| 83. | (+)-catechin-3-O-gallate                                  |    | <i>Orostachys japonicus</i>   | $142.8 \pm 3.7 \mu\text{M}$<br>(IC <sub>50</sub> )     | $367.3 \pm 3.2 \mu\text{M}$<br>(IC <sub>50</sub> )  | [57] |
| 84. | (-)-epicatechin-3,5-O-digallate                           |    | <i>Orostachys japonicus</i>   | $98.3 \pm 2.1 \mu\text{M}$<br>(IC <sub>50</sub> )      | $30.4 \pm 2.4 \mu\text{M}$<br>(IC <sub>50</sub> )   | [57] |
| 85. | Hesperetin                                                |   | <i>Citrus spp.</i>            | $45.70 \pm 2.69 \mu\text{M}$<br>(IC <sub>50</sub> )    | >100 $\mu\text{M}$ (IC <sub>50</sub> )              | [64] |
| 86. | Naringenin                                                |  | <i>Citrus spp.</i>            | $42.66 \pm 4.30 \mu\text{M}$<br>(IC <sub>50</sub> )    | >100 $\mu\text{M}$ (IC <sub>50</sub> )              | [64] |
|     |                                                           |                                                                                     | <i>Eupatorium adenophorum</i> | $45.23 \pm 3.74 \mu\text{g/mL}$<br>(IC <sub>50</sub> ) | -                                                   | [50] |
| 87. | Aromaden-drin (2S,3S)<br>3,4',5,7-tetra-hydroxyfla-vanone |  | <i>Dodonaea viscosa</i>       | $173.22 \pm 1.07 \mu\text{M}$<br>(IC <sub>50</sub> )   | $95.13 \pm 1.24 \mu\text{M}$<br>(IC <sub>50</sub> ) | [51] |
| 88. | Pinocembrin                                               |  | <i>Dodonaea viscosa</i>       | >200 $\mu\text{M}$ (IC <sub>50</sub> )                 | $99.36 \pm 0.87 \mu\text{M}$<br>(IC <sub>50</sub> ) | [51] |
| 89. | isoxanthohu-mol                                           |  | <i>Humulus lupulus</i>        | -                                                      | $13.87 \pm 0.95 \%$<br>(100 $\mu\text{M}$ )         | [56] |
| 90. | 6-prenylnaringenin                                        |  | <i>Humulus lupulus</i>        | $8.07 \pm 2.38 \%$<br>(100 $\mu\text{M}$ )             | $31.11 \pm 3.92 \%$<br>(100 $\mu\text{M}$ )         | [56] |

|      |                                                     |                                                                                     |                            |                                                        |                                                        |      |
|------|-----------------------------------------------------|-------------------------------------------------------------------------------------|----------------------------|--------------------------------------------------------|--------------------------------------------------------|------|
| 91.  | Hesperidin                                          | 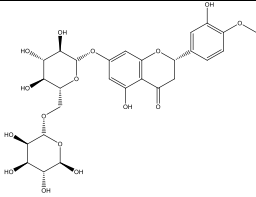   | <i>Citrus spp</i>          | $22.80 \pm 2.78$<br>$\mu\text{M}$ ( $\text{IC}_{50}$ ) | $48.09 \pm 0.74$<br>$\mu\text{M}$ ( $\text{IC}_{50}$ ) | [64] |
| 92.  | Nostotrebin 6                                       |    | <i>Nostoc sp</i>           | $5.5 \mu\text{M}$ ( $\text{IC}_{50}$ )                 | $6.1 \mu\text{M}$ ( $\text{IC}_{50}$ )                 | [65] |
| 93.  | 2,6-di-methoxyl-p-benzoquinone                      |    | <i>Xylia xylocarpa</i>     | $54.4 \pm 3.4 \mu\text{M}$<br>( $\text{IC}_{50}$ )     | $42.7 \pm 7.6 \mu\text{M}$<br>( $\text{IC}_{50}$ )     | [19] |
| 94.  | 2-hydroxy-3-(1,1-dimethylallyl)-1,4-naphthoquinone) |    | <i>Calceolaria talcana</i> | -                                                      | $142.4 \mu\text{g/mL}$<br>( $\text{IC}_{50}$ )         | [28] |
| 95.  | chrysophanol                                        |  | <i>Xylia xylocarpa</i>     | $77.3 \pm 0.8 \mu\text{M}$<br>( $\text{IC}_{50}$ )     | $>100 \mu\text{M}$ ( $\text{IC}_{50}$ )                | [19] |
| 96.  | 8-Deoxygarcitanin                                   |  | <i>Garcinia mangostana</i> | $20.41 \mu\text{M}$ ( $\text{IC}_{50}$ )               | $6.47 \mu\text{M}$ ( $\text{IC}_{50}$ )                | [66] |
| 97.  | Garcinone C                                         |  | <i>Garcinia mangostana</i> | $1.24 \mu\text{M}$ ( $\text{IC}_{50}$ )                | $8.96 \mu\text{M}$ ( $\text{IC}_{50}$ )                | [66] |
| 98.  | Mangostanol                                         |  | <i>Garcinia mangostana</i> | $5.77 \mu\text{M}$ ( $\text{IC}_{50}$ )                | $10.41 \mu\text{M}$ ( $\text{IC}_{50}$ )               | [66] |
| 99.  | 3-Isomangostin                                      |  | <i>Garcinia mangostana</i> | $5.75 \mu\text{M}$ ( $\text{IC}_{50}$ )                | $12.96 \mu\text{M}$ ( $\text{IC}_{50}$ )               | [66] |
| 100. | $\alpha$ -Mangostin                                 |                                                                                     | <i>Garcinia mangostana</i> | $2.14 \mu\text{M}$ ( $\text{IC}_{50}$ )                | $5.41 \mu\text{M}$ ( $\text{IC}_{50}$ )                | [66] |

|      |                      |                                                                                     |                                      |                                          |                                          |      |
|------|----------------------|-------------------------------------------------------------------------------------|--------------------------------------|------------------------------------------|------------------------------------------|------|
| 101. | $\gamma$ -Mangostin  | 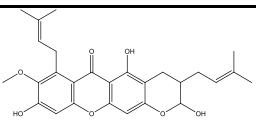   | <i>Garcinia fusca</i>                | 2.38±0.20 $\mu$ M (IC <sub>50</sub> )    | 3.18±0.05 $\mu$ M (IC <sub>50</sub> )    | [67] |
|      |                      |    | <i>Garcinia mangostana</i>           | 1.31 $\mu$ M (IC <sub>50</sub> )         | 1.78 $\mu$ M (IC <sub>50</sub> )         | [66] |
|      |                      |    | <i>Garcinia fusca</i>                | 2.62±0.06 $\mu$ M (IC <sub>50</sub> )    | 1.05±0.02 $\mu$ M (IC <sub>50</sub> )    | [67] |
| 102. | Mangiferin           |    | <i>Belamcandae chinensis rhizoma</i> | -                                        | 8.99 ± 2.26 % (100 $\mu$ g/mL)           | [59] |
| 103. | 3-hydroxyxanthohumol |   | <i>Humulus lupulus</i>               | 72.12 ± 1.54 % (100 $\mu$ M)             | 68.95 ± 2.54 % (100 $\mu$ M)             | [56] |
| 104. | Xanthohumol          |  | <i>Humulus lupulus</i>               | 55.71 ± 2.63 % (100 $\mu$ M)             | 75.76 ± 3.77 % (100 $\mu$ M)             | [56] |
| 105. | xanthohumol B        |  | <i>Humulus lupulus</i>               | 18.00 ± 3.30 % (100 $\mu$ M)             | 47.52 ± 2.02 % (100 $\mu$ M)             | [56] |
| 106. | xanthohumol D        |  | <i>Humulus lupulus</i>               | 9.42 ± 2.06 % (100 $\mu$ M)              | 20.86 ± 3.61 % (100 $\mu$ M)             | [56] |
| 107. | Moracin M            |  | <i>Morus alba</i>                    | 49.53 ± 1.01 $\mu$ M (IC <sub>50</sub> ) | 38.08 ± 0.57 $\mu$ M (IC <sub>50</sub> ) | [68] |
| 108. | Moracin P            |  | <i>Morus alba</i>                    | 52.59 ± 1.06 $\mu$ M (IC <sub>50</sub> ) | 37.96 ± 0.91 $\mu$ M (IC <sub>50</sub> ) | [68] |
| 109. | Moracin O            |  | <i>Morus alba</i>                    | 21.63 ± 3.26 $\mu$ M (IC <sub>50</sub> ) | 28.22 ± 0.31 $\mu$ M (IC <sub>50</sub> ) | [68] |
| 110. | Moracin S            |  | <i>Morus alba</i>                    | 32.36 ± 0.49 $\mu$ M (IC <sub>50</sub> ) | 7.22 ± 0.22 $\mu$ M (IC <sub>50</sub> )  | [68] |

|      |                                             |                                                                                     |                                     |                                                           |                                                           |      |
|------|---------------------------------------------|-------------------------------------------------------------------------------------|-------------------------------------|-----------------------------------------------------------|-----------------------------------------------------------|------|
| 111. | 1,2,3,6-Tetra-O-galloyl- $\beta$ -D-glucose | 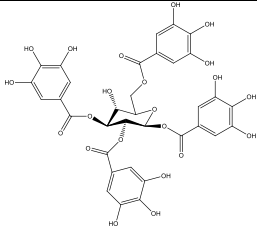   | <i>Cornus officinalis</i>           | $85.64 \pm 0.03$<br>$\mu\text{g/mL}$ ( $\text{IC}_{50}$ ) | $70.22 \pm 0.44$<br>$\mu\text{g/mL}$ ( $\text{IC}_{50}$ ) | [69] |
| 112. | Tellima-grandin I                           |    | <i>Cornus officinalis</i>           | $87.52 \pm 0.32$<br>$\mu\text{g/mL}$ ( $\text{IC}_{50}$ ) | $92.08 \pm 3.39$<br>$\mu\text{g/mL}$ ( $\text{IC}_{50}$ ) | [69] |
| 113. | Tellima-grandin II                          |   | <i>Cornus officinalis</i>           | $11.86 \pm 0.56$<br>$\mu\text{g/mL}$ ( $\text{IC}_{50}$ ) | $18.29 \pm 0.01$<br>$\mu\text{g/mL}$ ( $\text{IC}_{50}$ ) | [69] |
| 114. | Isoterchebin                                |  | <i>Cornus officinalis</i>           | $47.55 \pm 0.54$<br>$\mu\text{g/mL}$ ( $\text{IC}_{50}$ ) | $20.65 \pm 0.29$<br>$\mu\text{g/mL}$ ( $\text{IC}_{50}$ ) | [69] |
| 115. | Isocorilagin                                |  | <i>Phyllanthus niruri</i>           | $0.49 \mu\text{M}$ ( $\text{IC}_{50}$ )                   | $4.20 \mu\text{M}$ ( $\text{IC}_{50}$ )                   | [70] |
| 116. | verbascoside                                |  | <i>Calceolaria talcana</i>          | $189.8 \mu\text{g/mL}$<br>( $\text{IC}_{50}$ )            | $105.9 \mu\text{g/mL}$<br>( $\text{IC}_{50}$ )            | [28] |
|      |                                             |                                                                                     | <i>Sideritis germani-copolitana</i> | $25.18 \pm 0.62\%$<br>( $250 \mu\text{g/mL}$ )            | $13.11 \pm 0.51\%$<br>( $250 \mu\text{g/mL}$ )            | [32] |
|      |                                             |                                                                                     | <i>Citharexylum spinosum</i>        | -                                                         | $80.24 \pm 2.15 \mu\text{M}$<br>( $\text{IC}_{50}$ )      | [36] |

|      |                                                   |                                                                                     |                             |                                                          |                                                       |      |
|------|---------------------------------------------------|-------------------------------------------------------------------------------------|-----------------------------|----------------------------------------------------------|-------------------------------------------------------|------|
| 117. | Garcineflavanone A                                | 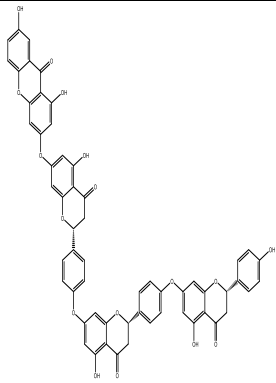   | <i>Garcinia atroviridis</i> | $80.15 \pm 6.65 \%$<br>(100 $\mu\text{M}$ )              | $12 \pm 3.84 \%$<br>(100 $\mu\text{M}$ )              | [71] |
| 118. | Garcineflavonol A                                 |    | <i>Garcinia atroviridis</i> | $68.45 \pm 0.97 \%$<br>(100 $\mu\text{M}$ )              | $54.66 \pm 3.87 \%$<br>(100 $\mu\text{M}$ )           | [71] |
| 119. | Oleralignan A                                     |   | <i>Portulaca oleracea</i>   | $58.31 \pm 0.23$<br>$\mu\text{M}$ ( $\text{IC}_{50}$ )   | -                                                     | [29] |
| 120. | trans-coumaric acid methyl ester                  |  | <i>Portulaca oleracea</i>   | $93.88 \pm 0.39$<br>$\mu\text{M}$ ( $\text{IC}_{50}$ )   | -                                                     | [29] |
|      |                                                   |  | <i>Thunbergia erecta</i>    | $30.8 \pm 1.61$<br>ng/mL ( $\text{IC}_{50}$ )            | -                                                     | [47] |
| 121. | Vanillic acid                                     |  | <i>Croton oligandrus</i>    | -                                                        | $62.2 \pm 0.06$ $\mu\text{M}$<br>( $\text{IC}_{50}$ ) | [72] |
|      |                                                   |  | <i>Bassia indica</i>        | $88.3 \pm 1.10$<br>$\mu\text{g/mL}$ ( $\text{IC}_{50}$ ) | -                                                     | [34] |
| 122. | trans-Ferulic acid                                |  | <i>Thunbergia erecta</i>    | $127.9 \pm 7.31$<br>ng/mL ( $\text{IC}_{50}$ )           | -                                                     | [47] |
| 123. | 3,4,5-Tri-methoxyphenol-1-O- $\beta$ -D-glucoside |  | <i>Thunbergia erecta</i>    | $212.03 \pm 9.31$<br>ng/mL ( $\text{IC}_{50}$ )          | -                                                     | [47] |
| 124. | Acacetin-7-O- $\beta$ -D-glucoside                |  | <i>Thunbergia erecta</i>    | $49.57 \pm 2.14$<br>ng/mL ( $\text{IC}_{50}$ )           | -                                                     | [47] |

|      |                                                                                     |                                                                                     |                              |                                             |                                   |      |
|------|-------------------------------------------------------------------------------------|-------------------------------------------------------------------------------------|------------------------------|---------------------------------------------|-----------------------------------|------|
| 125. | Acacetin 7-O-( $\alpha$ -D-apiofuranosyl) (1 $\rightarrow$ 6)- $\beta$ -D-glucoside | 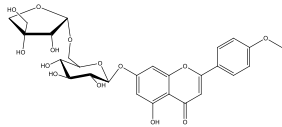   | <i>Thunbergia erecta</i>     | 372.70 $\pm$ 21.3 ng/mL (IC <sub>50</sub> ) | -                                 | [47] |
| 126. | Benzyl-7-O- $\beta$ -xylopyranosyl (1'' $\rightarrow$ 2')- $\beta$ -D-glucoside     |    | <i>Thunbergia erecta</i>     | 107.70 $\pm$ 6.16 ng/mL (IC <sub>50</sub> ) | -                                 | [47] |
| 127. | p-Coumaric acid                                                                     |    | <i>Ziziphus oxyphylla</i>    | 80 $\mu$ g/mL (IC <sub>50</sub> )           | 80 $\mu$ g/mL (IC <sub>50</sub> ) | [73] |
| 128. | 3,4-dimethoxy benzoic acid                                                          |    | <i>Ziziphus oxyphylla</i>    | 90 $\mu$ g/mL (IC <sub>50</sub> )           | 91 $\mu$ g/mL (IC <sub>50</sub> ) | [73] |
| 129. | 4-Heptyloxy benzoic acid                                                            |   | <i>Ziziphus oxyphylla</i>    | 89 $\mu$ g/mL (IC <sub>50</sub> )           | 90 $\mu$ g/mL (IC <sub>50</sub> ) | [73] |
| 130. | Tomentocarpin A                                                                     |  | <i>Lespedeza tomentosa</i>   | -                                           | 0.50 mM (IC <sub>50</sub> )       | [74] |
| 131. | Tomentocarpin B                                                                     |  | <i>Lespedeza tomentosa</i>   | -                                           | 0.62 mM (IC <sub>50</sub> )       | [74] |
| 132. | Pholidotaphenan-threnequinone A                                                     |  | <i>Pholidota cantonensis</i> | 59.96 $\pm$ 1.88% (50 $\mu$ g/mL)           | -                                 | [75] |
| 133. | 2,7-Dihydroxy-4-methoxy-9,10-dihydrophenylene                                       |  | <i>Pholidota cantonensis</i> | 23.26 $\pm$ 1.51% (50 $\mu$ g/mL)           | -                                 | [75] |
| 134. | cis-3,3'-Dihydroxy-5-                                                               |  | <i>Pholidota cantonensis</i> | 33.76 $\pm$ 0.38% (50 $\mu$ g/mL)           | -                                 | [75] |

|      |                                   |                                                                                     |                              |                                        |   |      |
|------|-----------------------------------|-------------------------------------------------------------------------------------|------------------------------|----------------------------------------|---|------|
|      | methoxystilbene                   |                                                                                     |                              |                                        |   |      |
| 135. | Thunalbene                        | 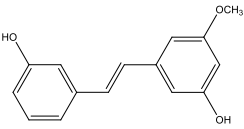   | <i>Pholidota cantonensis</i> | 37.23±0.82%<br>(50 µg/mL)              | - | [75] |
| 136. | Batatasin III                     |    | <i>Pholidota cantonensis</i> | 15.95±0.25%<br>(50 µg/mL)              | - | [75] |
| 137. | 1,3,5-Tri-methoxybenzene          |    | <i>Pholidota cantonensis</i> | 99.59±0.43%<br>(50 µg/mL)              | - | [75] |
| 138. | Phocantol                         |    | <i>Pholidota cantonensis</i> | 58.58±1.98%<br>(50 µg/mL)              | - | [75] |
| 139. | 3,5-Di-methoxy-3'-hydroxybibenzyl |   | <i>Pholidota cantonensis</i> | 51.21±0.99%<br>(50 µg/mL)              | - | [75] |
| 140. | Deoxyrhapontigenin                |  | <i>Rheum lhasaense</i>       | 463.07±17.46<br>µM (IC <sub>50</sub> ) | - | [60] |
| 141. | Desoxyrhaponticin                 |  | <i>Rheum lhasaense</i>       | 912.97±78.51<br>µM (IC <sub>50</sub> ) | - | [60] |
| 142. | 4'-methoxyscirpusin A             |  | <i>Rheum lhasaense</i>       | 2.18±0.67 µM<br>(IC <sub>50</sub> )    | - | [60] |
| 143. | Piceatannol-3'-O-glucoside        |  | <i>Rheum lhasaense</i>       | 287.83±69.32<br>µM (IC <sub>50</sub> ) | - | [60] |

|      |                                                                                     |                                                                                     |                                     |                                           |                              |      |
|------|-------------------------------------------------------------------------------------|-------------------------------------------------------------------------------------|-------------------------------------|-------------------------------------------|------------------------------|------|
| 144. | $\epsilon$ -viniferin                                                               | 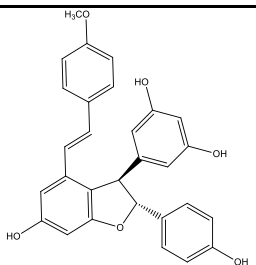   | <i>Rheum lhasaense</i>              | 113.73±11.01 $\mu$ M (IC <sub>50</sub> )  | -                            | [60] |
| 145. | Polydatin                                                                           |    | <i>Rheum lhasaense</i>              | 694.13±150.62 $\mu$ M (IC <sub>50</sub> ) | -                            | [60] |
| 146. | Piceatannol-3'-O-[2''-(3,5-dihydroxy-4-methoxybenzoyl)]- $\beta$ -D-glucopyranoside |    | <i>Rheum lhasaense</i>              | 38.93±1.66 $\mu$ M (IC <sub>50</sub> )    | -                            | [60] |
| 147. | Piceatannol-3'-O-(2''-galloyl)- $\beta$ -D-glucopyranoside                          |  | <i>Rheum lhasaense</i>              | 45.18±8.83 $\mu$ M (IC <sub>50</sub> )    | -                            | [60] |
| 148. | Martynoside                                                                         |  | <i>Sideritis germani-copolitana</i> | 20.75±0.50% (250 $\mu$ g/mL)              | 12.08±0.33% (250 $\mu$ g/mL) | [32] |
| 149. | Leucoseptoside A                                                                    |  | <i>Sideritis germani-copolitana</i> | 21.30±0.71% (250 $\mu$ g/mL)              | 11.50±0.48% (250 $\mu$ g/mL) | [32] |
| 150. | Lamalboside                                                                         |  | <i>Sideritis germani-copolitana</i> | 21.37±0.69% (250 $\mu$ g/mL)              | 16.92±0.48% (250 $\mu$ g/mL) | [32] |
| 151. | De-caffeoylverbascoside                                                             |  | <i>Sideritis germani-copolitana</i> | 18.35±0.53% (250 $\mu$ g/mL)              | 11.05±0.25% (250 $\mu$ g/mL) | [32] |
| 152. | Xanthomicrol                                                                        |  | <i>Sideritis germani-copolitana</i> | 19.47±0.66% (250 $\mu$ g/mL)              | 11.36±0.36% (250 $\mu$ g/mL) | [32] |

|      |                                                                                                                                        |                                                                                     |                                          |                                        |                            |      |
|------|----------------------------------------------------------------------------------------------------------------------------------------|-------------------------------------------------------------------------------------|------------------------------------------|----------------------------------------|----------------------------|------|
| 153. | Isoscutel-<br>larenin 7-O-<br>[6'''-O-acetyl-<br>β-allopyra-<br>nosyl-<br>(1→2)]-β-glu-<br>copyranoside                                | 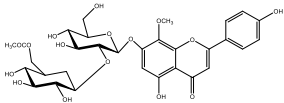   | <i>Sideritis germani-<br/>copolitana</i> | 18.47±0.41%<br>(250 µg/mL)             | 12.91±0.39%<br>(250 µg/mL) | [32] |
| 154. | 4'-O-methyl-<br>isoscutel-<br>larenin 7-O-<br>[6'''-O-acetyl-<br>β-allopyra-<br>nosyl-<br>(1→2)]-β-glu-<br>copyranoside                |    | <i>Sideritis germani-<br/>copolitana</i> | 27.90±0.68%<br>(250 µg/mL)             | 16.32±0.29%<br>(250 µg/mL) | [32] |
| 155. | 3'-hydroxy-<br>4'-O-methyl-<br>isoscutel-<br>larenin 7-O-<br>[6'''-O-acetyl-<br>β-allopyra-<br>nosyl-<br>(1→2)]-β-glu-<br>copyranoside |   | <i>Sideritis germani-<br/>copolitana</i> | 22.79±0.78%<br>(250 µg/mL)             | 19.41±0.63%<br>(250 µg/mL) | [32] |
| 156. | Dehydro-<br>diconiferylal-<br>cohol 4-O-β-<br>D-glucopyra-<br>nose                                                                     |  | <i>Sideritis germani-<br/>copolitana</i> | 24.32±0.57%<br>(250 µg/mL)             | 14.28±0.41%<br>(250 µg/mL) | [32] |
| 157. | Pinoresinol<br>4'-O-β-gluco-<br>pyranoside                                                                                             |  | <i>Sideritis germani-<br/>copolitana</i> | 20.17±0.44%<br>(250 µg/mL)             | 11.02±0.35%<br>(250 µg/mL) | [32] |
| 158. | o-hy-<br>droxybenzoic<br>acid                                                                                                          |  | <i>Bassia indica</i>                     | 48.5% (250<br>µg/mL)                   | -                          | [34] |
| 159. | p-hy-<br>droxybenzoic<br>acid                                                                                                          |  | <i>Bassia indica</i>                     | 203.2±4.5<br>µg/mL (IC <sub>50</sub> ) | -                          | [34] |

|      |                                                                                                                                                                                                 |                                                                                     |                      |                                         |   |      |
|------|-------------------------------------------------------------------------------------------------------------------------------------------------------------------------------------------------|-------------------------------------------------------------------------------------|----------------------|-----------------------------------------|---|------|
| 160. | caffeic acid                                                                                                                                                                                    | 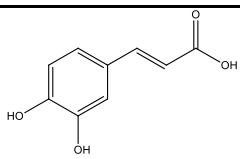   | <i>Bassia indica</i> | 112.9±3.08<br>μg/mL (IC <sub>50</sub> ) | - | [34] |
| 161. | tachioside                                                                                                                                                                                      |    | <i>Bassia indica</i> | 26% (250<br>μg/mL)                      | - | [34] |
| 162. | isorham-<br>netin-3-O-β-<br>D-glucoside                                                                                                                                                         |    | <i>Bassia indica</i> | 93.2±1.2<br>μg/mL (IC <sub>50</sub> )   | - | [34] |
| 163. | kaempferol-<br>3-O-rutino-<br>side                                                                                                                                                              |   | <i>Bassia indica</i> | 27.9±0.8<br>μg/mL (IC <sub>50</sub> )   | - | [34] |
| 164. | kaempferol-<br>3-O-β-Dglu-<br>copyranosyl-<br>(1→6)-O-[β-<br>D-galactopy-<br>ranosyl-<br>(1→3)-2-O-<br>trans-feru-<br>loyl-α-L-<br>rhamnopyra-<br>nosyl-<br>(1→2)]-β-D-<br>glucopyra-<br>noside |  | <i>Bassia indica</i> | 40.6% (250<br>μg/mL)                    | - | [34] |
| 165. | isorham-<br>netin-3-O-β-<br>D-glucopyra-<br>nosyl-(1→6)-<br>O-[α-Lrham-<br>nopyranosyl-<br>(1→2)]-β-D-<br>glucopyra-<br>noside                                                                  |  | <i>Bassia indica</i> | 35% (250<br>μg/mL)                      | - | [34] |

|      |                                                                  |                                                                                     |                              |                                     |                                     |      |
|------|------------------------------------------------------------------|-------------------------------------------------------------------------------------|------------------------------|-------------------------------------|-------------------------------------|------|
| 166. | Oleracone J                                                      | 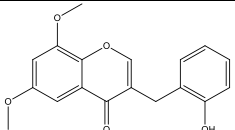   | <i>Portulaca oleracea</i>    | 59.08±0.05 µM (IC <sub>50</sub> )   | -                                   | [76] |
| 167. | Oleracone K                                                      |    | <i>Portulaca oleracea</i>    | 67.89 ± 0.09 µM (IC <sub>50</sub> ) | -                                   | [76] |
| 168. | Leucosceptoside A                                                |    | <i>Citharexylum spinosum</i> | -                                   | 72.85±1.14 µM (IC <sub>50</sub> )   | [36] |
| 169. | Martynoside                                                      |    | <i>Citharexylum spinosum</i> | -                                   | 58.77±2.00 µM (IC <sub>50</sub> )   | [36] |
| 170. | Isoverbascoside                                                  |    | <i>Citharexylum spinosum</i> | -                                   | 48.47±1.80 µM (IC <sub>50</sub> )   | [36] |
| 171. | Plantainoside C                                                  |   | <i>Citharexylum spinosum</i> | -                                   | 28.44±0.86 µM (IC <sub>50</sub> )   | [36] |
| 172. | 4-hydroxy-2,6-dimethoxyphenyl 6'-O-vanilloyl-β-D-glucopyranoside |  | <i>Citharexylum spinosum</i> | -                                   | 117.65±2.46 µM (IC <sub>50</sub> )  | [36] |
| 173. | Plucheoside D <sub>1</sub>                                       |  | <i>Citharexylum spinosum</i> | -                                   | 98.14±2.72 µM (IC <sub>50</sub> )   | [36] |
| 174. | Plucheoside D <sub>2</sub>                                       |  | <i>Citharexylum spinosum</i> | -                                   | 71.28 ± 2.82 µM (IC <sub>50</sub> ) | [36] |
| 175. | Tyrosol                                                          |  | <i>Citharexylum spinosum</i> | -                                   | 120.18±1.90 µM (IC <sub>50</sub> )  | [36] |

|      |                                                                                  |                                                                                     |                              |                                        |                                        |      |
|------|----------------------------------------------------------------------------------|-------------------------------------------------------------------------------------|------------------------------|----------------------------------------|----------------------------------------|------|
| 176. | quercetin-3-O-[2''-O-(6'''-O-E-feruloyl)-β-D-glucopyranosyl]-β-D-glucopyranoside | 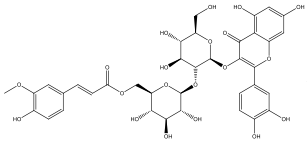   | <i>Hedyotis diffusa</i>      | 46.22 ± 1.59<br>μM (IC <sub>50</sub> ) | 13.77 ± 0.37<br>μM (IC <sub>50</sub> ) | [37] |
| 177. | 6''-O-p-hydroxybenzoyl-davidioside                                               |    | <i>Viburnum davidii</i>      | 36.883±3.021<br>μM (IC <sub>50</sub> ) | 39.274±0.491<br>μM (IC <sub>50</sub> ) | [77] |
| 178. | Davidioside                                                                      |    | <i>Viburnum davidii</i>      | 39.504±1.121<br>μM (IC <sub>50</sub> ) | 43.101±0.512<br>μM (IC <sub>50</sub> ) | [77] |
| 179. | ciquitin A                                                                       |   | <i>Leucophyllum ambiguum</i> | 3 nM (IC <sub>50</sub> )               | -                                      | [78] |
| 180. | ciquitin B                                                                       |  | <i>Leucophyllum ambiguum</i> | 28 nM (IC <sub>50</sub> )              | -                                      | [78] |
| 181. | ciquitin D                                                                       |  | <i>Leucophyllum ambiguum</i> | 158 nM (IC <sub>50</sub> )             | -                                      | [78] |
| 182. | 3-methoxy-kobusin                                                                |  | <i>Leucophyllum ambiguum</i> | 93 nM (IC <sub>50</sub> )              | -                                      | [78] |
| 183. | sasertemin                                                                       |  | <i>Leucophyllum ambiguum</i> | 0.46 μM (IC <sub>50</sub> )            | -                                      | [78] |
| 184. | yangambin                                                                        |  | <i>Leucophyllum ambiguum</i> | 0.616 μM (IC <sub>50</sub> )           | -                                      | [78] |
| 185. | magnolin                                                                         |  | <i>Leucophyllum ambiguum</i> | 0.903 μM (IC <sub>50</sub> )           | -                                      | [78] |

|      |                                                         |                                                                                     |                              |                                                     |                                                     |      |
|------|---------------------------------------------------------|-------------------------------------------------------------------------------------|------------------------------|-----------------------------------------------------|-----------------------------------------------------|------|
| 186. | ciquitin C                                              | 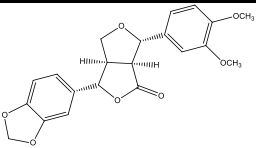   | <i>Leucophyllum ambiguum</i> | 2.229 $\mu\text{M}$ ( $\text{IC}_{50}$ )            | -                                                   | [78] |
| 187. | Garcinia bi-flavonoid 2                                 |    | <i>Garcinia fusca</i>        | -                                                   | 16.75 $\pm$ 0.23 $\mu\text{M}$ ( $\text{IC}_{50}$ ) | [67] |
| 188. | (+) gallo cate-chin                                     |    | <i>Kadsura coccinea</i>      | 46.78 $\pm$ 1.92 $\mu\text{M}$ ( $\text{IC}_{50}$ ) | -                                                   | [40] |
| 189. | (-)-epicate-chin                                        |    | <i>Kadsura coccinea</i>      | 68.28 $\pm$ 1.11 $\mu\text{M}$ ( $\text{IC}_{50}$ ) | -                                                   | [40] |
| 190. | Icariside E3                                            |   | <i>Kadsura coccinea</i>      | 59.59 $\pm$ 1.62 $\mu\text{M}$ ( $\text{IC}_{50}$ ) | -                                                   | [40] |
| 191. | (-)-secoiso-lariciresinol-9-O $\beta$ -D-xylopyranoside |  | <i>Kadsura coccinea</i>      | 59.14 $\pm$ 3.84 $\mu\text{M}$ ( $\text{IC}_{50}$ ) | -                                                   | [40] |
| 192. | cimida-hurinine                                         |  | <i>Kadsura coccinea</i>      | 87.20 $\pm$ 1.12 $\mu\text{M}$ ( $\text{IC}_{50}$ ) | -                                                   | [40] |
| 193. | salidroside                                             |  | <i>Kadsura coccinea</i>      | 98.75 $\pm$ 2.20 $\mu\text{M}$ ( $\text{IC}_{50}$ ) | -                                                   | [40] |
| 194. | chlorogenic acid                                        |  | <i>Kadsura coccinea</i>      | 57.58 $\pm$ 2.45 $\mu\text{M}$ ( $\text{IC}_{50}$ ) | -                                                   | [40] |
| 195. | 3-methoxy-yquercetin                                    |  | <i>Cassia timorensis</i>     | 83.71 $\pm$ 4.67 $\mu\text{M}$ ( $\text{IC}_{50}$ ) | -                                                   | [79] |

|      |                                                                                    |  |                               |                                         |   |      |
|------|------------------------------------------------------------------------------------|--|-------------------------------|-----------------------------------------|---|------|
| 196. | querceta-<br>getin-7-O-(6-<br>O-caffeoyl-β-<br>D-glucopyra-<br>noside)             |  | <i>Eupatorium adenophorum</i> | 12.08±0.42<br>μg/mL (IC <sub>50</sub> ) | - | [50] |
| 197. | querceta-<br>getin-7-O-(6-<br>O-p-couma-<br>royl-β-gluco-<br>pyranoside)           |  | <i>Eupatorium adenophorum</i> | 15.01±0.01<br>μg/mL (IC <sub>50</sub> ) | - | [50] |
| 198. | 4'-methyl<br>quercetagetin<br>7-O-(6''-O-E-<br>caffeoyl glu-<br>copyra-<br>noside) |  | <i>Eupatorium adenophorum</i> | 17.12±0.40<br>μg/mL (IC <sub>50</sub> ) | - | [50] |
| 199. | 5,4'-Dihy-<br>droxytlavone                                                         |  | <i>Eupatorium adenophorum</i> | 28.63±1.66<br>μg/mL (IC <sub>50</sub> ) | - | [50] |
| 200. | chrysoeriol                                                                        |  | <i>Eupatorium adenophorum</i> | 49.27±0.40<br>μg/mL (IC <sub>50</sub> ) | - | [50] |
| 201. | chrysople-<br>netin                                                                |  | <i>Eupatorium adenophorum</i> | 86.01±2.52<br>μg/mL (IC <sub>50</sub> ) | - | [50] |
| 202. | quercetin-3-<br>O-β-D-gluco-<br>pyranoside                                         |  | <i>Eupatorium adenophorum</i> | 54.94±0.16<br>μg/mL (IC <sub>50</sub> ) | - | [50] |
| 203. | fortunellin                                                                        |  | <i>Eupatorium adenophorum</i> | 67.56±0.13<br>μg/mL (IC <sub>50</sub> ) | - | [50] |

|      |                        |                                                                                     |                               |                                      |                             |      |
|------|------------------------|-------------------------------------------------------------------------------------|-------------------------------|--------------------------------------|-----------------------------|------|
| 204. | 3-hydroxy-phloridzin   | 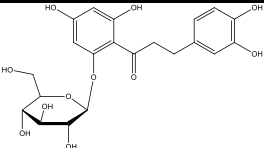   | <i>Eupatorium adenophorum</i> | 49.67±0.06 µg/mL (IC <sub>50</sub> ) | -                           | [50] |
| 205. | methylenebisphloridzin |    | <i>Eupatorium adenophorum</i> | 50.19±0.79 µg/mL (IC <sub>50</sub> ) | -                           | [50] |
| 206. | helichrysin A          |    | <i>Helichrysum plicatum</i>   | 1.69 µM (IC <sub>50</sub> )          | 2.27 µM (IC <sub>50</sub> ) | [48] |
| 207. | helichrysin B          |   | <i>Helichrysum plicatum</i>   | 2.90 µM (IC <sub>50</sub> )          | 3.89 µM (IC <sub>50</sub> ) | [48] |
| 208. | isosalipurposide       |  | <i>Helichrysum plicatum</i>   | 2.53 µM (IC <sub>50</sub> )          | 3.78 µM (IC <sub>50</sub> ) | [48] |
| 209. | Liquiritin apioside    |  | <i>Glycyrrhiza uralensis</i>  | 36.68±1.42 µM (IC <sub>50</sub> )    | >40 µM (IC <sub>50</sub> )  | [80] |
| 210. | Knepachy-carpic acid A |  | <i>Knema pachycarpa</i>       | 8.19±0.63 µM (IC <sub>50</sub> )     | -                           | [81] |
| 211. | Knepachy-carpic acid B |  | <i>Knema pachycarpa</i>       | 3.89±0.33 µM (IC <sub>50</sub> )     | -                           | [81] |
| 212. | Knepachy-carpanol A    |  | <i>Knema pachycarpa</i>       | 2.60±0.24 µM (IC <sub>50</sub> )     | -                           | [81] |
| 213. | Knepachy-carpanol B    |  | <i>Knema pachycarpa</i>       | 7.09±0.59 µM (IC <sub>50</sub> )     | -                           | [81] |

|      |                                 |                                                                                     |                                                     |                                         |                                       |      |
|------|---------------------------------|-------------------------------------------------------------------------------------|-----------------------------------------------------|-----------------------------------------|---------------------------------------|------|
| 214. | Knepachy-<br>carpasinol         | 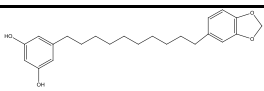   | <i>Knema pachycarpa</i>                             | 2.46±0.23 µM<br>(IC <sub>50</sub> )     | -                                     | [81] |
| 215. | licarin A                       |    | <i>Myristica fragrans</i>                           | 111.3±0.07<br>µg/mL (IC <sub>50</sub> ) | -                                     | [62] |
| 216. | Glabrateph-<br>rinol            |    | <i>Tephrosia purpurea</i><br>subsp. <i>dunensis</i> | 4.31±0.75 µM<br>(IC <sub>50</sub> )     | -                                     | [82] |
| 217. | garbogiol                       |    | <i>Garcinia fusca</i>                               | 23.90±0.59 µM<br>(IC <sub>50</sub> )    | 14.04±0.66 µM<br>(IC <sub>50</sub> )  | [67] |
| 218. | 3-methox-<br>ycowaxan-<br>thone |    | <i>Garcinia fusca</i>                               | 73.15±0.32 µM<br>(IC <sub>50</sub> )    | 108.28±0.47<br>µM (IC <sub>50</sub> ) | [67] |
| 219. | rheediaxan-<br>thone A          |   | <i>Garcinia fusca</i>                               | -                                       | 126.42±0.19<br>µM (IC <sub>50</sub> ) | [67] |
| 220. | cowanin                         |  | <i>Garcinia fusca</i>                               | 1.09±0.09 µM<br>(IC <sub>50</sub> )     | 0.51±0.006 µM<br>(IC <sub>50</sub> )  | [67] |
| 221. | cowaxan-<br>thone               |  | <i>Garcinia fusca</i>                               | 3.89±0.15 µM<br>(IC <sub>50</sub> )     | 4.25±1.09 µM<br>(IC <sub>50</sub> )   | [67] |
| 222. | Cowagarci-<br>none E            |  | <i>Garcinia fusca</i>                               | 0.79±0.05 µM<br>(IC <sub>50</sub> )     | 0.048±0.003<br>µM (IC <sub>50</sub> ) | [67] |
| 223. | Norcowanin                      |  | <i>Garcinia fusca</i>                               | 0.33±0.04 µM<br>(IC <sub>50</sub> )     | 0.35±0.03 µM<br>(IC <sub>50</sub> )   | [67] |
| 224. | Cowanol                         |  | <i>Garcinia fusca</i>                               | 0.72±0.05 µM<br>(IC <sub>50</sub> )     | 1.84±0.29 µM<br>(IC <sub>50</sub> )   | [67] |

|      |                     |                                                                                     |                          |                                    |                                     |      |
|------|---------------------|-------------------------------------------------------------------------------------|--------------------------|------------------------------------|-------------------------------------|------|
| 225. | Fuscaxanthone M     | 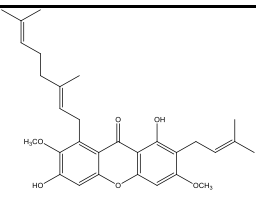   | <i>Garcinia fusca</i>    | 97.22±0.26 µM (IC <sub>50</sub> )  | 42.95±0.53 µM (IC <sub>50</sub> )   | [67] |
| 226. | Gartanin            |    | <i>Garcinia fusca</i>    | 9.35±0.0003 µM (IC <sub>50</sub> ) | 1.46±0.00003 µM (IC <sub>50</sub> ) | [67] |
| 227. | 8-desoxygartanin    |    | <i>Garcinia fusca</i>    | 20.41±0.14 µM (IC <sub>50</sub> )  | 1.23±0.00003 µM (IC <sub>50</sub> ) | [67] |
| 228. | β-mangostin         |    | <i>Garcinia fusca</i>    | -                                  | 82.00±0.60 µM (IC <sub>50</sub> )   | [67] |
| 229. | 7-methoxygartanin E |   | <i>Garcinia fusca</i>    | 10.95±0.13 µM (IC <sub>50</sub> )  | 2.92±0.06 µM (IC <sub>50</sub> )    | [67] |
| 230. | fuscaxanthone A     |  | <i>Garcinia fusca</i>    | 81.26±5.9 µM (IC <sub>50</sub> )   | 25.67±0.23 µM (IC <sub>50</sub> )   | [67] |
| 231. | Helminthosporin     |  | <i>Rumex abyssinicus</i> | 2.63±0.09 µM (IC <sub>50</sub> )   | 2.99±0.55 µM (IC <sub>50</sub> )    | [83] |
| 232. | Emodin              |  | <i>Rumex abyssinicus</i> | 15.21±3.52 µM (IC <sub>50</sub> )  | -                                   | [83] |
| 233. | Chrysophanol        |  | <i>Rumex abyssinicus</i> | 33.7±1.83 µM (IC <sub>50</sub> )   | -                                   | [83] |
| 234. | Physcion            |  | <i>Rumex abyssinicus</i> | 12.16±0.36 µM (IC <sub>50</sub> )  | -                                   | [83] |

|      |                        |                                                                                   |                            |                                       |                    |      |
|------|------------------------|-----------------------------------------------------------------------------------|----------------------------|---------------------------------------|--------------------|------|
| 235. | 4,8-Dihydroxytetralone | 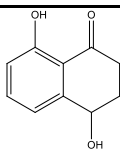 | <i>Carya illinoensis</i>   | 101.48±4.00 µg/mL (IC <sub>50</sub> ) | -                  | [84] |
| 236. | (+)-Ligbalinol         |  | <i>Momordica Charantia</i> | -                                     | 32.2±0.2 % (50 µM) | [85] |

Table S3: Coumarins as Acetyl and Butyryl cholinesterase inhibitors

| Number | Name                     | Structure                                                                           | Plant source                 | IC <sub>50</sub> or % inh (conc.) |                                        | Reference |
|--------|--------------------------|-------------------------------------------------------------------------------------|------------------------------|-----------------------------------|----------------------------------------|-----------|
|        |                          |                                                                                     |                              | AChE                              | BChE                                   |           |
| 1.     | Pteryxin                 | 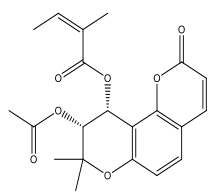  | <i>Mutellina purpurea</i>    | -                                 | 12.96 ± 0.70 mg/ml (IC <sub>50</sub> ) | [86]      |
| 2.     | psoralen                 |  | <i>Caryopteris odorata</i>   | -                                 | 312.53±0.28 µM (IC <sub>50</sub> )     | [87]      |
| 3.     | methoxsalen              |  | <i>Caryopteris odorata</i>   | -                                 | 203.72±0.27 µM (IC <sub>50</sub> )     | [87]      |
| 4.     | isoimperatorin           |  | <i>Caryopteris odorata</i>   | -                                 | 263.52±0.12 µM (IC <sub>50</sub> )     | [87]      |
|        |                          |                                                                                     | <i>Angelica archangelica</i> | >250 µM (IC <sub>50</sub> )       | >250 µM (IC <sub>50</sub> )            | [88]      |
| 5.     | oxypeucedanin            |  | <i>Caryopteris odorata</i>   | -                                 | 250.11±0.36 µM (IC <sub>50</sub> )     | [87]      |
|        |                          |                                                                                     | <i>Angelica purpurascens</i> | 19.3±1.87% (20 µg/mL)             | 36.89±1.23% (20 µg/mL)                 | [89]      |
| 6.     | bergamottin              |  | <i>Caryopteris odorata</i>   | -                                 | 234.42±0.58 µM (IC <sub>50</sub> )     | [87]      |
| 7.     | 7-Isopentenylxy coumarin |  | <i>Semi synthetic</i>        | 12.51 ± 2.83 % (100 µM)           | 11.77 ± 0.89 µM (IC <sub>50</sub> )    | [90]      |

|     |                                                          |                                                                                     |                                  |                                                 |                                                    |      |
|-----|----------------------------------------------------------|-------------------------------------------------------------------------------------|----------------------------------|-------------------------------------------------|----------------------------------------------------|------|
| 8.  | Auraptene                                                | 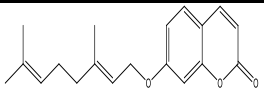   | <i>Semi synthetic</i>            | $6.75 \pm 2.20$ %<br>(100 $\mu$ M)              | $12.68 \pm 2.23$ $\mu$ M (IC <sub>50</sub> )       | [90] |
| 9.  | Umbelliprenin                                            |    | <i>Semi synthetic</i>            | -                                               | $26.66 \pm 1.11$ % (100 $\mu$ M)                   | [90] |
|     |                                                          |                                                                                     | <i>Heptaptera cili-<br/>cica</i> | $5.86 \pm 0.030$ $\mu$ M<br>(IC <sub>50</sub> ) | $1.10 \pm 0.190$ $\mu$ M (IC <sub>50</sub> )       | [91] |
| 10. | 7-Isopentenyl-<br>4-methylcoumarin                       |    | <i>Semi synthetic</i>            | $14.92 \pm 0.60$ %<br>(100 $\mu$ M)             | $8.18 \pm 0.74$ $\mu$ M (IC <sub>50</sub> )        | [90] |
| 11. | 7-Isopen-<br>tenyloxy-<br>coumarin-<br>3-carboxylic acid |    | <i>Semi synthetic</i>            | -                                               | $10.45 \pm 2.92$ % (100 $\mu$ M)                   | [90] |
| 12. | 3-Acetyl-7-isopen-<br>tenyloxy-<br>coumarin              |    | <i>Semi synthetic</i>            | $31.14 \pm 2.59$ %<br>(100 $\mu$ M)             | $11.75 \pm 1.82$ $\mu$ M (IC <sub>50</sub> )       | [90] |
| 13. | 3-Acetyl-7-<br>geranyloxy-<br>couma-<br>rin              |   | <i>Semi synthetic</i>            | -                                               | $16.29 \pm 2.03$ % (100 $\mu$ M)                   | [90] |
| 14. | 3-Acetyl-7-farne-<br>syloxy-<br>coumarin                 |  | <i>Semi synthetic</i>            | $6.14 \pm 2.11$ %<br>(100 $\mu$ M)              | $17.36 \pm 2.71$ % (100 $\mu$ M)                   | [90] |
| 15. | 3-Chloro-7-isopen-<br>tenyloxy-4-methyl-<br>coumarin     |  | <i>Semi synthetic</i>            | $11.47 \pm 1.73$ %<br>(100 $\mu$ M)             | $15.56 \pm 2.85$ % (100 $\mu$ M)                   | [90] |
| 16. | 3-Chloro-7-<br>geranyloxy-4-<br>methylcoumarin           |  | <i>Semi synthetic</i>            | $7.03 \pm 2.08$ %<br>(100 $\mu$ M)              | $16.64 \pm 2.64$ % (100 $\mu$ M)                   | [90] |
| 17. | 7-Geranyloxy-4-<br>methylcoumarin                        |  | <i>Semi synthetic</i>            | -                                               | $51.04 \pm 1.88$ % (100 $\mu$ M)                   | [90] |
| 18. | 3-Chloro-7-farne-<br>syloxy-4-methyl-<br>coumarin        |  | <i>Semi synthetic</i>            | $17.23 \pm 2.08$ %<br>(100 $\mu$ M)             | $23.77 \pm 2.19$ % (100 $\mu$ M)                   | [90] |
| 19. | 7-Farnesyloxy-4-<br>methylcoumarin                       |  | <i>Semi synthetic</i>            | -                                               | $23.82 \pm 2.41$ % (100 $\mu$ M)                   | [90] |
| 20. | umbelliprenin-<br>10',11'-monoepox-<br>ide               |  | <i>Heptaptera cili-<br/>cica</i> | > 100 $\mu$ M                                   | $12.59 \pm$<br>$0.021$ $\mu$ M (IC <sub>50</sub> ) | [91] |
| 21. | 6,7-Diisopen-<br>tenyloxy-<br>coumarin                   |  | <i>Semi synthetic</i>            | $40.39 \pm 3.81$ %<br>(100 $\mu$ M)             | -                                                  | [90] |

|     |                                      |                                                                                     |                                 |                                                |                                                   |      |
|-----|--------------------------------------|-------------------------------------------------------------------------------------|---------------------------------|------------------------------------------------|---------------------------------------------------|------|
| 22. | 6,7-Di-geranyloxycoumarin            | 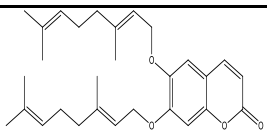   | <i>Semi synthetic</i>           | $11.70 \pm 3.99 \%$<br>(100 $\mu\text{M}$ )    | $7.01 \pm 2.73 \%$<br>(100 $\mu\text{M}$ )        | [90] |
| 23. | 6,7-Difarneyloxycoumarin             |    | <i>Semi synthetic</i>           | $21.33 \pm 0.55 \%$<br>(100 $\mu\text{M}$ )    | $21.35 \pm 1.53 \%$<br>(100 $\mu\text{M}$ )       | [90] |
| 24. | 7-Ethoxycoumarin                     |    | <i>Semi synthetic</i>           | $9.76 \pm 1.92 \%$<br>(100 $\mu\text{M}$ )     | $83.65 \pm 2.39 \mu\text{M}$ ( $\text{IC}_{50}$ ) | [90] |
| 25. | 7-(2'-Butenyloxy)coumarin            |    | <i>Semi synthetic</i>           | $9.75 \pm 2.09 \%$<br>(100 $\mu\text{M}$ )     | $16.49 \pm 0.99 \mu\text{M}$ ( $\text{IC}_{50}$ ) | [90] |
| 26. | 7-Styryloxycoumarin                  |    | <i>Semi synthetic</i>           | $26.72 \pm 1.93 \%$<br>(100 $\mu\text{M}$ )    | $7.01 \pm 0.28 \mu\text{M}$ ( $\text{IC}_{50}$ )  | [90] |
| 27. | 7-(2',2'-Dimethyl)-n propoxycoumarin |    | <i>Semi synthetic</i>           | -                                              | $26.77 \pm 1.35 \%$<br>(100 $\mu\text{M}$ )       | [90] |
| 28. | 7-Methoxycoumarin                    |    | <i>Semi synthetic</i>           | $4.32 \pm 1.01 \%$<br>(100 $\mu\text{M}$ )     | $46.53 \pm 2.39 \%$<br>(100 $\mu\text{M}$ )       | [90] |
| 29. | 7-(2'-Pentinyloxy) coumarin          |  | <i>Semi synthetic</i>           | $12.01 \pm 1.64 \%$<br>(100 $\mu\text{M}$ )    | $18.48 \pm 0.73 \mu\text{M}$ ( $\text{IC}_{50}$ ) | [90] |
| 30. | 7-(3'-Methyl)-n butyloxy) coumarin   |  | <i>Semi synthetic</i>           | $8.22 \pm 0.88 \%$<br>(100 $\mu\text{M}$ )     | $23.32 \pm 0.57 \mu\text{M}$ ( $\text{IC}_{50}$ ) | [90] |
| 31. | 7-Allyloxycoumarin                   |  | <i>Semi synthetic</i>           | $11.21 \pm 2.37 \%$<br>(100 $\mu\text{M}$ )    | $43.31 \pm 3.63 \mu\text{M}$ ( $\text{IC}_{50}$ ) | [90] |
| 32. | 7-n Propoxycoumarin                  |  | <i>Semi synthetic</i>           | $11.40 \pm 1.20 \%$<br>(100 $\mu\text{M}$ )    | $39.89 \pm 3.90 \mu\text{M}$ ( $\text{IC}_{50}$ ) | [90] |
| 33. | Imperatorin                          |  | <i>Angelica<br/>Officinalis</i> | $46.11 \pm 0.92 \%$<br>(100 $\mu\text{g/mL}$ ) | $83.9 \pm 80.99 \%$<br>(100 $\mu\text{g/mL}$ )    | [92] |
| 34. | phellopterin                         |  | <i>Angelica archangelica</i>    | $>250 \mu\text{M}$ ( $\text{IC}_{50}$ )        | $>250 \mu\text{M}$ ( $\text{IC}_{50}$ )           | [88] |

|     |                          |                                                                                     |                              |                                              |                                                |      |
|-----|--------------------------|-------------------------------------------------------------------------------------|------------------------------|----------------------------------------------|------------------------------------------------|------|
| 35. | Xanthotoxin              | 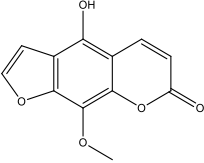   | <i>Angelica archangelica</i> | $156 \pm 15 \mu\text{M}$ (IC <sub>50</sub> ) | $14.4 \pm 3.2 \mu\text{M}$ (IC <sub>50</sub> ) | [88] |
| 36. | Bergapten                |    | <i>Angelica officinalis</i>  | $66.08 \pm 2.88 \%$ (100 $\mu\text{g/mL}$ )  | $88.0 \pm 40.83 \%$ (100 $\mu\text{g/mL}$ )    | [92] |
|     |                          |                                                                                     | <i>Angelica purpurascens</i> | $18.98 \pm 2.98 \%$ (20 $\mu\text{g/mL}$ )   | $31.00 \pm 3.0 \%$ (20 $\mu\text{g/mL}$ )      | [89] |
|     |                          |                                                                                     | <i>Angelica archangelica</i> | $>250 \mu\text{M}$ (IC <sub>50</sub> )       | $>250 \mu\text{M}$ (IC <sub>50</sub> )         | [88] |
| 37. | isopimpinelin            |   | <i>Angelica officinalis</i>  | $32.65 \pm 6.10 \%$ (25 $\mu\text{g/mL}$ )   | $86.69 \pm 2.56 \%$ (25 $\mu\text{g/mL}$ )     | [92] |
| 38. | Pimpinellin              |  | <i>Angelica archangelica</i> | $>250 \mu\text{M}$ (IC <sub>50</sub> )       | $>250 \mu\text{M}$ (IC <sub>50</sub> )         | [88] |
|     |                          |                                                                                     | <i>Leiotulus dasyanthus</i>  | $18.98 \pm 2.98 \%$ (20 $\mu\text{g/mL}$ )   | $31.00 \pm 3.02 \%$ (20 $\mu\text{g/mL}$ )     | [45] |
| 39. | heraclenol-2'-O-angelate |  | <i>Angelica archangelica</i> | $>1000 \mu\text{M}$ (IC <sub>50</sub> )      | $7.5 \pm 1.8 \mu\text{M}$ (IC <sub>50</sub> )  | [88] |

|     |                                |                                                                                     |                              |                                                     |                                                     |      |
|-----|--------------------------------|-------------------------------------------------------------------------------------|------------------------------|-----------------------------------------------------|-----------------------------------------------------|------|
| 40. | byakangelicin-2'-O-angelate    | 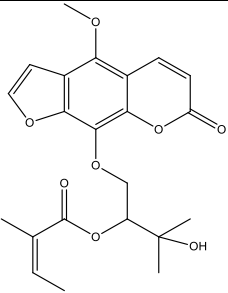   | <i>Angelica archangelica</i> | >1000 $\mu\text{M}$ ( $\text{IC}_{50}$ )            | >1000 $\mu\text{M}$ ( $\text{IC}_{50}$ )            | [88] |
| 41. | byakangelicin-2'-O-isovalerate |    | <i>Angelica archangelica</i> | >1000 $\mu\text{M}$ ( $\text{IC}_{50}$ )            | >1000 $\mu\text{M}$ ( $\text{IC}_{50}$ )            | [88] |
|     |                                |                                                                                     | <i>Angelica archangelica</i> | >250 $\mu\text{M}$ ( $\text{IC}_{50}$ )             | >250 $\mu\text{M}$ ( $\text{IC}_{50}$ )             | [88] |
| 42. | Umbelliferone                  |   | <i>Leiotulus dasyanthus</i>  | $23.54 \pm 1.29$ % (20 $\mu\text{g/mL}$ )           | $66.55 \pm 2.61$ % (20 $\mu\text{g/mL}$ )           | [45] |
|     |                                |                                                                                     | <i>Leiotulus dasyanthus</i>  | $61.09 \pm 4.46$ % (20 $\mu\text{g/mL}$ )           | $40.99 \pm 5.61$ % (20 $\mu\text{g/mL}$ )           | [45] |
| 43. | osthol                         |  | <i>Angelica archangelica</i> | >250 $\mu\text{M}$ ( $\text{IC}_{50}$ )             | >250 $\mu\text{M}$ ( $\text{IC}_{50}$ )             | [88] |
| 44. | conferone                      |  | <i>Heptaptera ciliatica</i>  | $3.31 \pm 0.014$ $\mu\text{M}$ ( $\text{IC}_{50}$ ) | $9.31 \pm 0.280$ $\mu\text{M}$ ( $\text{IC}_{50}$ ) | [91] |
| 45. | mogoltacin                     |  | <i>Heptaptera ciliatica</i>  | $1.95 \pm 0.050$ $\mu\text{M}$ ( $\text{IC}_{50}$ ) | $9.74 \pm 0.003$ $\mu\text{M}$ ( $\text{IC}_{50}$ ) | [91] |
| 46. | feselol                        |  | <i>Heptaptera ciliatica</i>  | $1.26 \pm 0.010$ $\mu\text{M}$ ( $\text{IC}_{50}$ ) | $9.98 \pm 0.240$ $\mu\text{M}$ ( $\text{IC}_{50}$ ) | [91] |

|     |                                 |                                                                                     |                             |                                     |                                   |      |
|-----|---------------------------------|-------------------------------------------------------------------------------------|-----------------------------|-------------------------------------|-----------------------------------|------|
| 47. | Daphnetin                       | 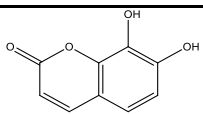   | <i>Portulaca oleracea</i>   | 72.16 ± 0.28 µM (IC <sub>50</sub> ) | -                                 | [29] |
| 48. | Esculetin                       |    | <i>Portulaca oleracea</i>   | 71.50 ± 0.39 µM (IC <sub>50</sub> ) | -                                 | [29] |
| 49. | Scopoletin                      |    | <i>Croton oligandrus</i>    | -                                   | 79.2±0.26 µM (IC <sub>50</sub> )  | [72] |
|     |                                 |                                                                                     | <i>Argyreia speciosa</i>    | 5.34 µM (IC <sub>50</sub> )         | 9.11 µM (IC <sub>50</sub> )       | [93] |
| 50. | 6,7-dihydroxycoumarin           |    | <i>Bassia indica</i>        | 3.6±0.07 µg/mL (IC <sub>50</sub> )  | -                                 | [34] |
| 51. | Kamonol acetate                 |    | <i>Ferula pseudalliacea</i> | 63.9 µM (IC <sub>50</sub> )         | -                                 | [94] |
| 52. | 3',4'-diseneciylkhellactone     |   | <i>Peucedanum japonicum</i> | 21.3±7.69 µM (IC <sub>50</sub> )    | 10.7±0.060 µM (IC <sub>50</sub> ) | [95] |
| 53. | seneciyl4'-angeloyl-khellactone |  | <i>Peucedanum japonicum</i> | >40 µM (IC <sub>50</sub> )          | 7.20±0.79 µM (IC <sub>50</sub> )  | [95] |
| 54. | calipteryxin                    |  | <i>Peucedanum japonicum</i> | 25.6±4.50 µM (IC <sub>50</sub> )    | >40 µM (IC <sub>50</sub> )        | [95] |
| 55. | Anomalin                        |  | <i>Peucedanum japonicum</i> | 17.9±5.59 µM (IC <sub>50</sub> )    | >40 µM (IC <sub>50</sub> )        | [95] |

|     |                                               |                                                                                     |                             |                                   |                                  |      |
|-----|-----------------------------------------------|-------------------------------------------------------------------------------------|-----------------------------|-----------------------------------|----------------------------------|------|
| 56. | 3'-senecieryl-4'-isovalerylkhellactone        | 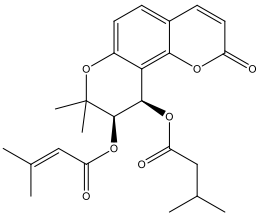   | <i>Peucedanum japonicum</i> | 31.6±4.40 µM (IC <sub>50</sub> )  | >40 µM (IC <sub>50</sub> )       | [95] |
| 57. | 3'-isovaleryl-4'-senecierylkhellactone        |    | <i>Peucedanum japonicum</i> | 36.1±0.66 µM (IC <sub>50</sub> )  | 12.5±2.82 µM (IC <sub>50</sub> ) | [95] |
| 58. | 3'-senecieryl-4'-(2-methylbutyryl)khellactone |   | <i>Peucedanum japonicum</i> | >40 µM (IC <sub>50</sub> )        | 10.2±2.25 µM (IC <sub>50</sub> ) | [95] |
| 59. | 3'-isovaleryl-4'-angeloylkhellactone          |  | <i>Peucedanum japonicum</i> | 29.0±1.15 µM (IC <sub>50</sub> )  | >40 µM (IC <sub>50</sub> )       | [95] |
| 60. | 3'-angeloyl-4'-(2-methylbutyryl)khellactone   |  | <i>Peucedanum japonicum</i> | 9.28±0.094 µM (IC <sub>50</sub> ) | >40 µM (IC <sub>50</sub> )       | [95] |
| 61. | 3',4'-diisovalerylkhellactone                 |  | <i>Peucedanum japonicum</i> | 28.1±0.33 µM (IC <sub>50</sub> )  | >40 µM (IC <sub>50</sub> )       | [95] |

|     |                                                |                                                                                   |                             |                                  |                            |      |
|-----|------------------------------------------------|-----------------------------------------------------------------------------------|-----------------------------|----------------------------------|----------------------------|------|
| 62. | 3'-isovaleryl-4'-(2-methyl-butyryl)khellactone | 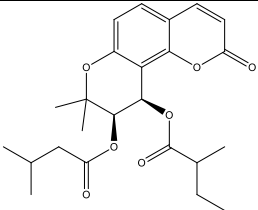 | <i>Peucedanum japonicum</i> | 10.0±0.48 µM (IC <sub>50</sub> ) | >40 µM (IC <sub>50</sub> ) | [95] |
|-----|------------------------------------------------|-----------------------------------------------------------------------------------|-----------------------------|----------------------------------|----------------------------|------|

Table S4: Other Acetyl and Butyryl cholinesterase inhibitors

| Number | Name                                                      | Structure                                                                           | Plant source                     | IC <sub>50</sub> or %inh. (conc.)     |                                         | Reference |
|--------|-----------------------------------------------------------|-------------------------------------------------------------------------------------|----------------------------------|---------------------------------------|-----------------------------------------|-----------|
|        |                                                           |                                                                                     |                                  | AChE                                  | BChE                                    |           |
| 1.     | dioctyl phthalate                                         | 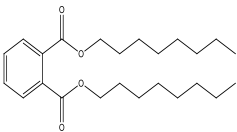   | <i>Lonicera quinquelocularis</i> | 8.74 ± 0.07 mg/mL (IC <sub>50</sub> ) | 20.12 ± 0.079 mg/mL (IC <sub>50</sub> ) | [96]      |
| 2.     | Bis (7-acetoxy-2-ethyl-5-methylheptyl) phthalate          |   | <i>Lonicera quinquelocularis</i> | 1.65 ± 0.03 mg/mL (IC <sub>50</sub> ) | 5.98 ± 0.079 mg/mL (IC <sub>50</sub> )  | [96]      |
| 3.     | Neopentyl-4-ethoxy-3,5-bis [3-methyl-2-butenyl] benzoate  |  | <i>Lonicera quinquelocularis</i> | 5.27 ± 0.04 mg/mL (IC <sub>50</sub> ) | 14.76 ± 0.087 mg/mL (IC <sub>50</sub> ) | [96]      |
| 4.     | Neopentyl-4-hydroxy-3,5-bis [3-methyl-2-butenyl] benzoate |  | <i>Lonicera quinquelocularis</i> | 3.43 ± 0.02 mg/mL (IC <sub>50</sub> ) | 9.84 ± 0.037 mg/mL (IC <sub>50</sub> )  | [96]      |
| 5.     | eluptol                                                   |  | <i>Pycnanthus angolensis</i>     | 22.26 µg/ml (IC <sub>50</sub> )       | 34.61 µg/ml (IC <sub>50</sub> )         | [97]      |
| 6.     | omifoate A                                                |  | <i>Pycnanthus angolensis</i>     | 6.51 µg/ml (IC <sub>50</sub> )        | 9.07 µg/ml (IC <sub>50</sub> )          | [97]      |

|     |                                               |                                                                                     |                              |                                             |                                             |       |
|-----|-----------------------------------------------|-------------------------------------------------------------------------------------|------------------------------|---------------------------------------------|---------------------------------------------|-------|
| 7.  | Chuanxiongdiolide A                           | 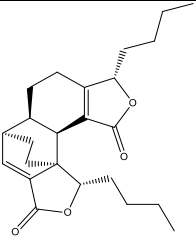   | <i>Ligusticum chuanxiong</i> | -                                           | 63.0% (50 $\mu$ M)                          | [98]  |
| 8.  | Chuanxiongdiolide B                           |    | <i>Ligusticum chuanxiong</i> | -                                           | 21.7% (50 $\mu$ M)                          | [98]  |
| 9.  | (-)-Pteroside N                               |    | <i>Pteridium aquilinum</i>   | 7.39 $\pm$ 0.99 $\mu$ M (IC <sub>50</sub> ) | 4.47 $\pm$ 0.29 $\mu$ M (IC <sub>50</sub> ) | [99]  |
| 10. | pterosinone                                   |   | <i>Pteridium aquilinum</i>   | 72.9 $\pm$ 0.73 $\mu$ M (IC <sub>50</sub> ) | 87.7 $\pm$ 1.6 $\mu$ M (IC <sub>50</sub> )  | [99]  |
| 11. | $\beta$ -Sitosterol-3-O- $\beta$ -D-glucoside |  | <i>Thunbergia erecta</i>     | 75.72 $\pm$ 4.33 ng/mL (IC <sub>50</sub> )  | -                                           | [47]  |
| 12. | Hysteroside                                   |  | <i>Hysterangium inflatum</i> | 35.63 $\pm$ 0.46% (100 $\mu$ g/mL)          | 45.37 $\pm$ 0.81% (100 $\mu$ g/mL)          | [100] |
| 13. | Brassicasterol                                |  | <i>Hysterangium inflatum</i> | 21.69 $\pm$ 0.55% (100 $\mu$ g/mL)          | 30.93 $\pm$ 0.95% (100 $\mu$ g/mL)          | [100] |
| 14. | Ergosterol                                    |  | <i>Hysterangium inflatum</i> | 20.66 $\pm$ 0.98% (100 $\mu$ g/mL)          | 24.74 $\pm$ 1.05% (100 $\mu$ g/mL)          | [100] |
| 15. | Ergosterol D                                  |  | <i>Hysterangium inflatum</i> | 28.76 $\pm$ 0.54% (100 $\mu$ g/mL)          | 39.21 $\pm$ 0.86% (100 $\mu$ g/mL)          | [100] |
| 16. | Ergosterol peroxide                           |  | <i>Hysterangium inflatum</i> | 13.61 $\pm$ 0.42% (100 $\mu$ g/mL)          | 25.57 $\pm$ 1.20% (100 $\mu$ g/mL)          | [100] |

|     |                                                                                  |  |                                 |                                        |                                  |       |
|-----|----------------------------------------------------------------------------------|--|---------------------------------|----------------------------------------|----------------------------------|-------|
| 17. | Docosanoic acid                                                                  |  | <i>Grewia optiva</i>            | 130 µg/mL (IC <sub>50</sub> )          | 130 µg/mL (IC <sub>50</sub> )    | [30]  |
| 18. | Methanetriol mono formate                                                        |  | <i>Grewia optiva</i>            | 75 µg/mL (IC <sub>50</sub> )           | 75 µg/mL (IC <sub>50</sub> )     | [30]  |
| 19. | 2,2'-(1,4-phenylene)bis(3-methylbutanoic acid)                                   |  | <i>Grewia optiva</i>            | 55 µg/mL (IC <sub>50</sub> )           | 60 µg/mL (IC <sub>50</sub> )     | [30]  |
| 20. | Agelarin A                                                                       |  | <i>Suberea clavata</i>          | 0.19±0.2                               | -                                | [101] |
| 21. | 11,17-dideoxyfistularin                                                          |  | <i>Suberea clavata</i>          | 10±0.3                                 | -                                | [101] |
| 22. | 11-hydroxyaerotherionin                                                          |  | <i>Suberea clavata</i>          | 10±0.3                                 | -                                | [101] |
| 23. | Geddic acid                                                                      |  | <i>Croton oligandrus</i>        | -                                      | 69.2±0.24 µM (IC <sub>50</sub> ) | [72]  |
|     |                                                                                  |  | <i>Croton oligandrus</i>        | -                                      | 36.3±0.92 µM (IC <sub>50</sub> ) | [72]  |
| 24. | β-sitosterol                                                                     |  | <i>Bassia indica</i>            | 55.8±3.8 µg/mL (IC <sub>50</sub> )     | -                                | [34]  |
|     |                                                                                  |  | <i>Kadsura coccinea</i>         | 67.37±1.28 µM (IC <sub>50</sub> )      | -                                | [40]  |
|     |                                                                                  |  | <i>Helichrysum plicatum</i>     | 2.59 µM (IC <sub>50</sub> )            | 2.18 µM (IC <sub>50</sub> )      | [48]  |
| 25. | Stigmastane-3,6-dione                                                            |  | <i>Croton oligandrus</i>        | -                                      | 85.4±0.76 µM (IC <sub>50</sub> ) | [72]  |
| 26. | 3-(R)-acetyl-1-(3',4'-dihydroxyphenyl)-7-(4''-hydroxy-3''-methoxyphenyl)-heptane |  | <i>Carya illinoensis</i>        | 247.64±59.36 µg/mL (IC <sub>50</sub> ) | -                                | [84]  |
| 27. | 11-Oxo-1,17-epoxy-7-(2-hydroxyphenyl)-13-(16-methoxyphenyl)-heptane              |  | <i>Carya illinoensis</i>        | 330.60±25.89 µg/mL (IC <sub>50</sub> ) | -                                | [84]  |
| 28. | Eloundemnoside                                                                   |  | <i>Celtis adolphifridgerici</i> | -                                      | 66.6±0.92 µM (IC <sub>50</sub> ) | [33]  |

|     |                                                  |  |                                 |                                      |                                      |       |
|-----|--------------------------------------------------|--|---------------------------------|--------------------------------------|--------------------------------------|-------|
| 29. | Heptacosanoic acid                               |  | <i>Celtis adolphi-friderici</i> | -                                    | 45.2±0.73 µM (IC <sub>50</sub> )     | [33]  |
| 30. | Glycerol-1-octadecanoate                         |  | <i>Celtis adolphi-friderici</i> | -                                    | 61.1±0.51 µM (IC <sub>50</sub> )     | [33]  |
| 31. | thymidine                                        |  | <i>Bassia indica</i>            | 45.7±0.57 µg/mL (IC <sub>50</sub> )  | -                                    | [34]  |
| 32. | Stigmastadienone                                 |  | <i>Isodon rugosus</i>           | 13.52 µg/mL (IC <sub>50</sub> )      | 11.53 µg/mL (IC <sub>50</sub> )      | [102] |
| 33. | Cremaphenanthrene F                              |  | <i>Cremastra appendiculata</i>  | >200 µM (IC <sub>50</sub> )          | 14.62±2.15 µM (IC <sub>50</sub> )    | [103] |
| 34. | Cremaphenanthrene G                              |  | <i>Cremastra appendiculata</i>  | >200 µM (IC <sub>50</sub> )          | 79.56±0.78 µM (IC <sub>50</sub> )    | [103] |
| 35. | 2,3,4-trimethoxy-7,8-methylenedioxyphenanthrene  |  | <i>Dioscorea communis</i>       | 11.30±0.34% (200 µg/mL)              | 37.51±2.97% (200 µg/mL)              | [104] |
| 36. | 2,4-dimethoxy-7,8-methylenedioxy-3-phenanthrenol |  | <i>Dioscorea communis</i>       | 42.53±0.72% (200 µg/mL)              | 11.40±0.24 µg/mL (IC <sub>50</sub> ) | [104] |
| 37. | 2,4,8-trimethoxy-3,7-phenanthrenediol            |  | <i>Dioscorea communis</i>       | 69.41±2.46 µg/mL (IC <sub>50</sub> ) | 14.60±0.56 µg/mL (IC <sub>50</sub> ) | [104] |
| 38. | Oleraciamide E                                   |  | <i>Portulaca oleracea</i>       | 52.43±0.33 µM (IC <sub>50</sub> )    | -                                    | [105] |
| 39. | Galactomannan II                                 |  | <i>Ganoderma adspersum</i>      | 36.71±0.94 µg/mL (IC <sub>50</sub> ) | 40.18±0.26 µg/mL (IC <sub>50</sub> ) | [106] |

|     |                       |                                                                                     |                               |                                                 |                                               |       |
|-----|-----------------------|-------------------------------------------------------------------------------------|-------------------------------|-------------------------------------------------|-----------------------------------------------|-------|
| 40. | Maclobin              | 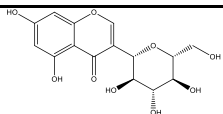   | <i>Macrolobium latifolium</i> | 0.80 $\mu$ M (IC <sub>50</sub> )                | -                                             | [107] |
| 41. | Spinasterol           |    | <i>Acacia auriculiformis</i>  | 44.19 $\pm$ 2.59 $\mu$ g/mL (IC <sub>50</sub> ) | -                                             | [108] |
| 42. | Seladelicatulasmine A |    | <i>Selaginella delicatula</i> | 0.31 $\pm$ 0.060 $\mu$ M (IC <sub>50</sub> )    | 0.37 $\pm$ 0.145 $\mu$ M (IC <sub>50</sub> )  | [109] |
| 43. | Seladelicatulasmine B |    | <i>Selaginella delicatula</i> | 0.09 $\pm$ 0.014 $\mu$ M (IC <sub>50</sub> )    | 2.01 $\pm$ 0.005 $\mu$ M (IC <sub>50</sub> )  | [109] |
| 44. | Seladelicatulasmine C |    | <i>Selaginella delicatula</i> | 5.86 $\pm$ 1.213 $\mu$ M (IC <sub>50</sub> )    | 20.65 $\pm$ 3.376 $\mu$ M (IC <sub>50</sub> ) | [109] |
| 45. | Seladelicatulasmine D |  | <i>Selaginella delicatula</i> | 9.79 $\pm$ 1.738 $\mu$ M (IC <sub>50</sub> )    | 17.99 $\pm$ 1.557 $\mu$ M (IC <sub>50</sub> ) | [109] |
| 46. | Seladelicatulasmine E |  | <i>Selaginella delicatula</i> | 0.04 $\pm$ 0.017 $\mu$ M (IC <sub>50</sub> )    | 1.68 $\pm$ 0.080 $\mu$ M (IC <sub>50</sub> )  | [109] |
| 47. | Seladelicatulasmine F |  | <i>Selaginella delicatula</i> | 3.26 $\pm$ 0.348 $\mu$ M (IC <sub>50</sub> )    | 0.65 $\pm$ 0.004 $\mu$ M (IC <sub>50</sub> )  | [109] |
| 48. | Seladelicatulasmine G |  | <i>Selaginella delicatula</i> | 6.98 $\pm$ 0.936 $\mu$ M (IC <sub>50</sub> )    | 2.52 $\pm$ 0.003 $\mu$ M (IC <sub>50</sub> )  | [109] |
| 49. | Glycyrol              |  | <i>Glycyrrhiza uralensis</i>  | 14.77 $\pm$ 0.19 $\mu$ M (IC <sub>50</sub> )    | 7.22 $\pm$ 0.37 $\mu$ M (IC <sub>50</sub> )   | [80]  |
| 50. | Eucalyprobusal F      |  | <i>Eucalyptus robusta</i>     | 3.22 $\pm$ 0.36 $\mu$ M (IC <sub>50</sub> )     | -                                             | [110] |

|     |                                              |  |                                 |                                   |                                   |       |
|-----|----------------------------------------------|--|---------------------------------|-----------------------------------|-----------------------------------|-------|
| 51. | Eucalyprobusone C                            |  | <i>Eucalyptus robusta</i>       | 3.82±0.22 µM (IC <sub>50</sub> )  | -                                 | [110] |
| 52. | Eucalyprobusone D                            |  | <i>Eucalyptus robusta</i>       | 36.22±2.29 µM (IC <sub>50</sub> ) | -                                 | [110] |
| 53. | Dipolynaphthalene B                          |  | <i>Marasmius berte-roi</i>      | 42.74±0.93% (50 µg/mL)            | -                                 | [111] |
| 54. | Naphthone C                                  |  | <i>Marasmius berte-roi</i>      | 44.63±0.52% (50 µg/mL)            | -                                 | [111] |
| 55. | Daldinone C                                  |  | <i>Marasmius berte-roi</i>      | 39.50±2.14% (50 µg/mL)            | -                                 | [111] |
| 56. | 8-methoxynaphthalene-1,7-diol                |  | <i>Marasmius berte-roi</i>      | 51.49±0.32% (50 µg/mL)            | -                                 | [111] |
| 57. | Goodyschle A                                 |  | <i>Goodyera schlehtendalana</i> | 78.52±6.43 µM (IC <sub>50</sub> ) | 6.88±1.63 µM (IC <sub>50</sub> )  | [112] |
| 58. | (3S)-hydroxy-3',4'-dimethoxy-L-phenylalanine |  | <i>Leucophyllum ambiguum</i>    | 1 nM (IC <sub>50</sub> )          | -                                 | [78]  |
| 59. | Aryl 2-benzofuran lakoochin A                |  | <i>Garcinia fusca</i>           | 27.22±0.40 µM (IC <sub>50</sub> ) | 13.65±0.05 µM (IC <sub>50</sub> ) | [67]  |

|     |                                             |                                                                                     |                                           |                                      |                             |       |
|-----|---------------------------------------------|-------------------------------------------------------------------------------------|-------------------------------------------|--------------------------------------|-----------------------------|-------|
| 60. | (6S,9R)- roseoside                          | 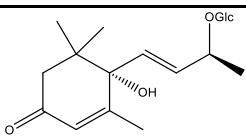   | <i>Kadsura coccinea</i>                   | 70.16±3.00<br>μM (IC <sub>50</sub> ) | -                           | [40]  |
| 61. | sinulariapeptide A                          |    | <i>Cochliobolus Lunatus</i><br>SCSIO41401 | 1.8±0.12 μM<br>(IC <sub>50</sub> )   | -                           | [113] |
| 62. | sinulariapeptide B                          |    | <i>Cochliobolus Lunatus</i><br>SCSIO41401 | 1.3±0.11 μM<br>(IC <sub>50</sub> )   | -                           | [113] |
| 63. | phthalide glycerol ether                    |    | <i>Cochliobolus Lunatus</i><br>SCSIO41401 | 2.5±0.21 μM<br>(IC <sub>50</sub> )   | -                           | [113] |
| 64. | nonacosanoic acid                           |   | <i>Helichrysum plicatum</i>               | 2.58 μM<br>(IC <sub>50</sub> )       | 3.56 μM (IC <sub>50</sub> ) | [48]  |
| 65. | β-sitosterol-3-O-β-D-glucopyranoside        |  | <i>Helichrysum plicatum</i>               | 1.72 μM<br>(IC <sub>50</sub> )       | 1.09 μM (IC <sub>50</sub> ) | [48]  |
| 66. | 3-methylbut-3-en-1-ol-O-β-D-glucopyranoside |  | <i>Cupressus macrocarpa</i>               | 144.31 μg/mL<br>(IC <sub>50</sub> )  | -                           | [41]  |
| 67. | blumenol-C-glucoside                        |  | <i>Cupressus macrocarpa</i>               | 263.68 μg/mL<br>(IC <sub>50</sub> )  | -                           | [41]  |
| 68. | Talaromycin A                               |  | <i>Talaromyces aurantiacus</i>            | 12.63 μM<br>(IC <sub>50</sub> )      | -                           | [114] |

|     |              |                                                                                     |                             |                                                     |                                                     |       |
|-----|--------------|-------------------------------------------------------------------------------------|-----------------------------|-----------------------------------------------------|-----------------------------------------------------|-------|
| 69. | hyperfol C   | 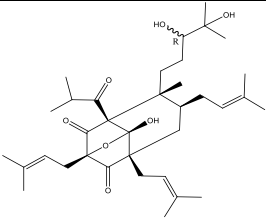   | <i>Hypericum perforatum</i> | $37.51 \pm 1.52$ $\mu\text{M}$ ( $\text{IC}_{50}$ ) | -                                                   | [115] |
| 70. | hyperfol F   |    | <i>Hypericum perforatum</i> | $20.32 \pm 0.68$ $\mu\text{M}$ ( $\text{IC}_{50}$ ) | -                                                   | [115] |
| 71. | hyphenrone T |    | <i>Hypericum perforatum</i> | $45.39 \pm 1.71$ $\mu\text{M}$ ( $\text{IC}_{50}$ ) | -                                                   | [115] |
| 72. | Hyphenrone U |   | <i>Hypericum perforatum</i> | $47.23 \pm 2.31$ $\mu\text{M}$ ( $\text{IC}_{50}$ ) | -                                                   | [115] |
| 73. | Uralione K   |  | <i>Hypericum perforatum</i> | $27.37 \pm 1.21$ $\mu\text{M}$ ( $\text{IC}_{50}$ ) | -                                                   | [115] |
| 74. | cassioate D  |  | <i>Cassia fistula</i>       | $17.8 \pm 0.32$ $\mu\text{M}$ ( $\text{IC}_{50}$ )  | $38.23 \pm 0.14$ $\mu\text{M}$ ( $\text{IC}_{50}$ ) | [116] |
| 75. | cassioate E  |  | <i>Cassia fistula</i>       | $10.26 \pm 0.44$ $\mu\text{M}$ ( $\text{IC}_{50}$ ) | $14.03 \pm 0.21$ $\mu\text{M}$ ( $\text{IC}_{50}$ ) | [116] |
| 76. | cassioate F  |  | <i>Cassia fistula</i>       | $4.20 \pm 0.01$ $\mu\text{M}$ ( $\text{IC}_{50}$ )  | $7.59 \pm 0.04$ $\mu\text{M}$ ( $\text{IC}_{50}$ )  | [116] |
